# Supplementary material for: Targeting CYP4A attenuates hepatic steatosis in a novel multicellular organotypic liver model
Source: PubMed Central journal article supplement (PMC6686528; doi:10.1186/s13036-019-0198-8), 2019-08-08

# Figure S1

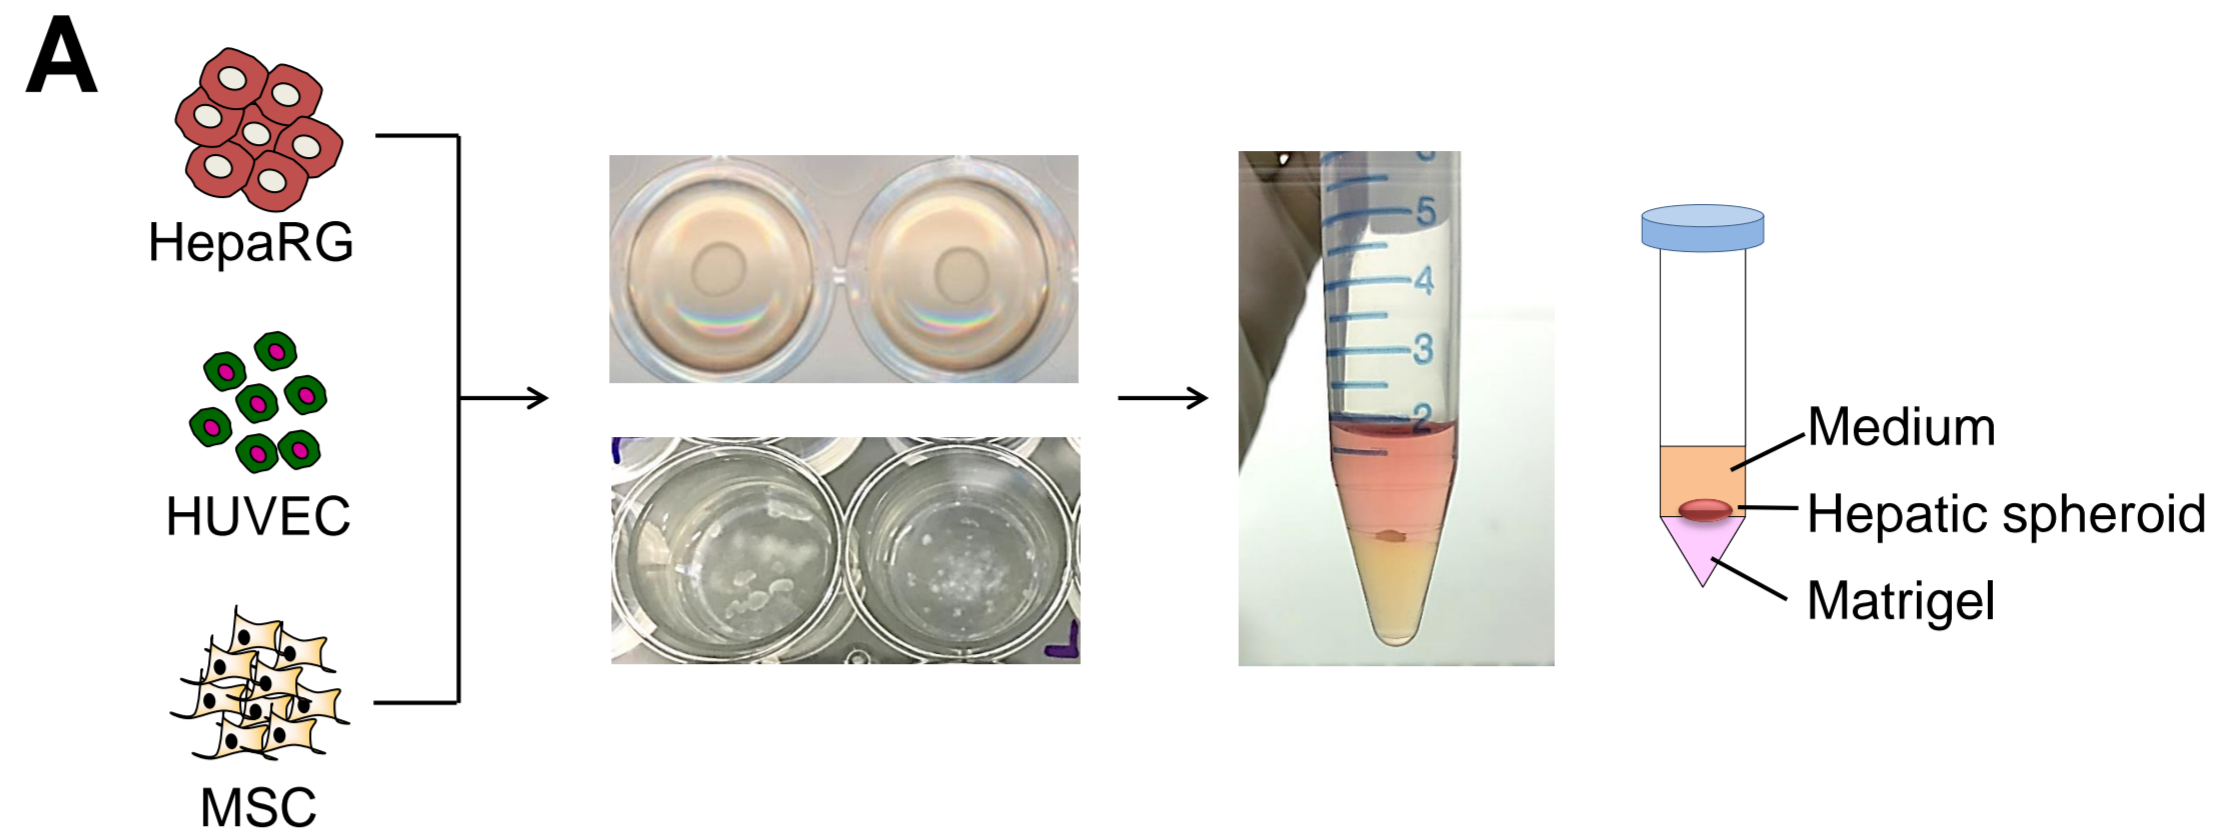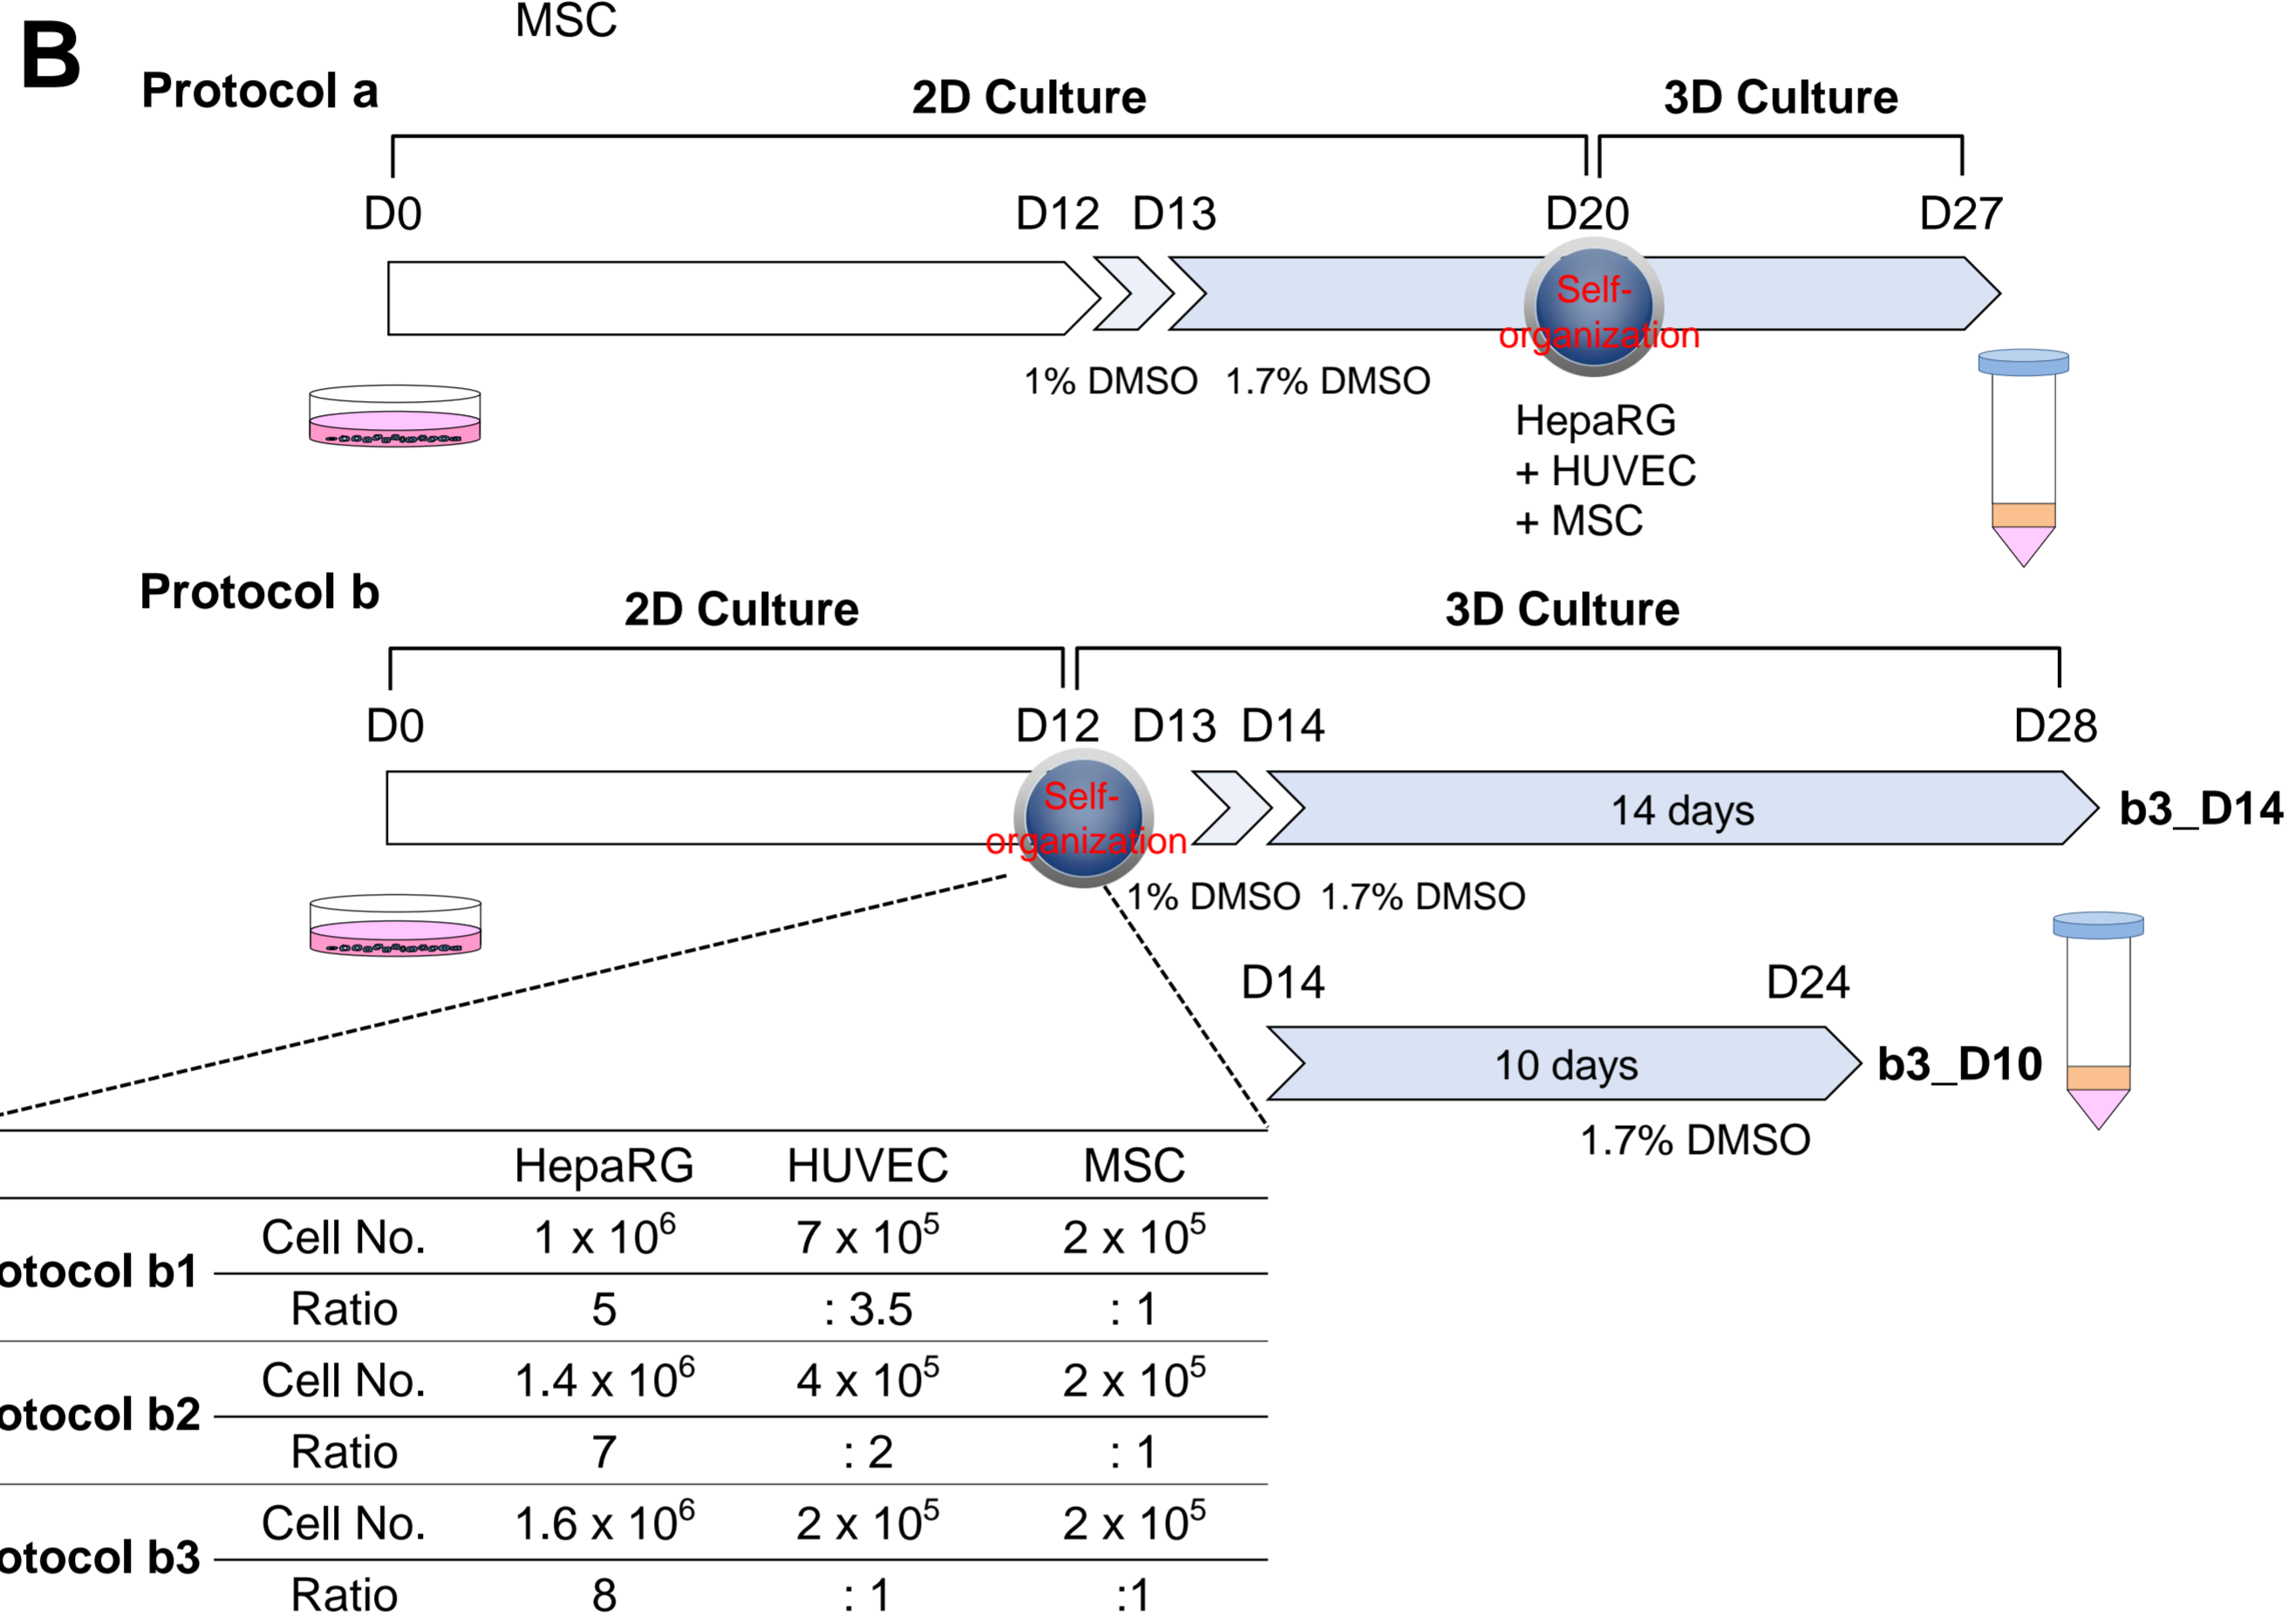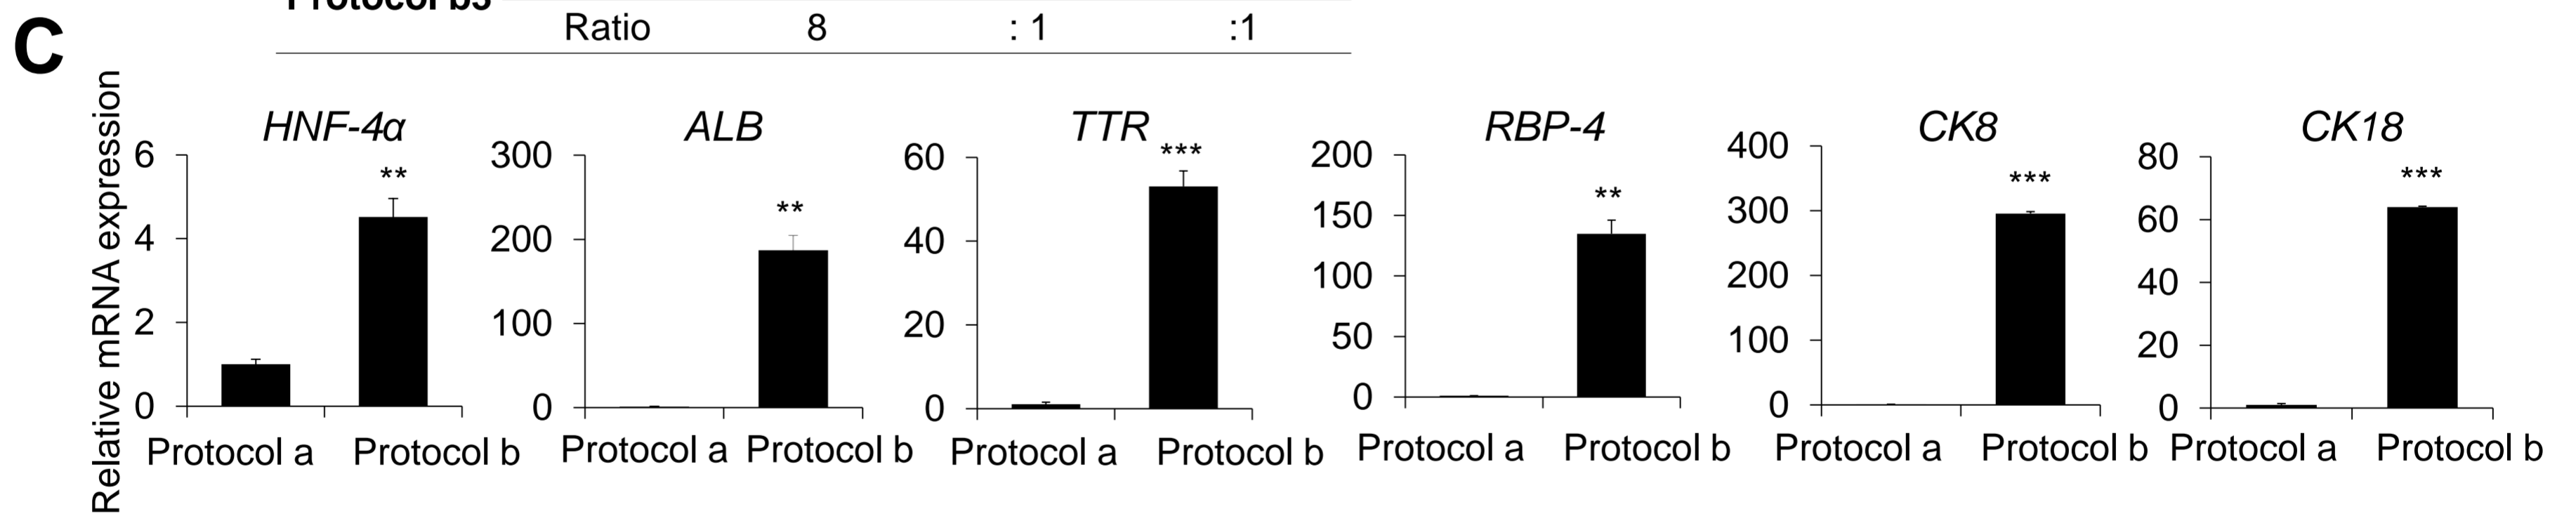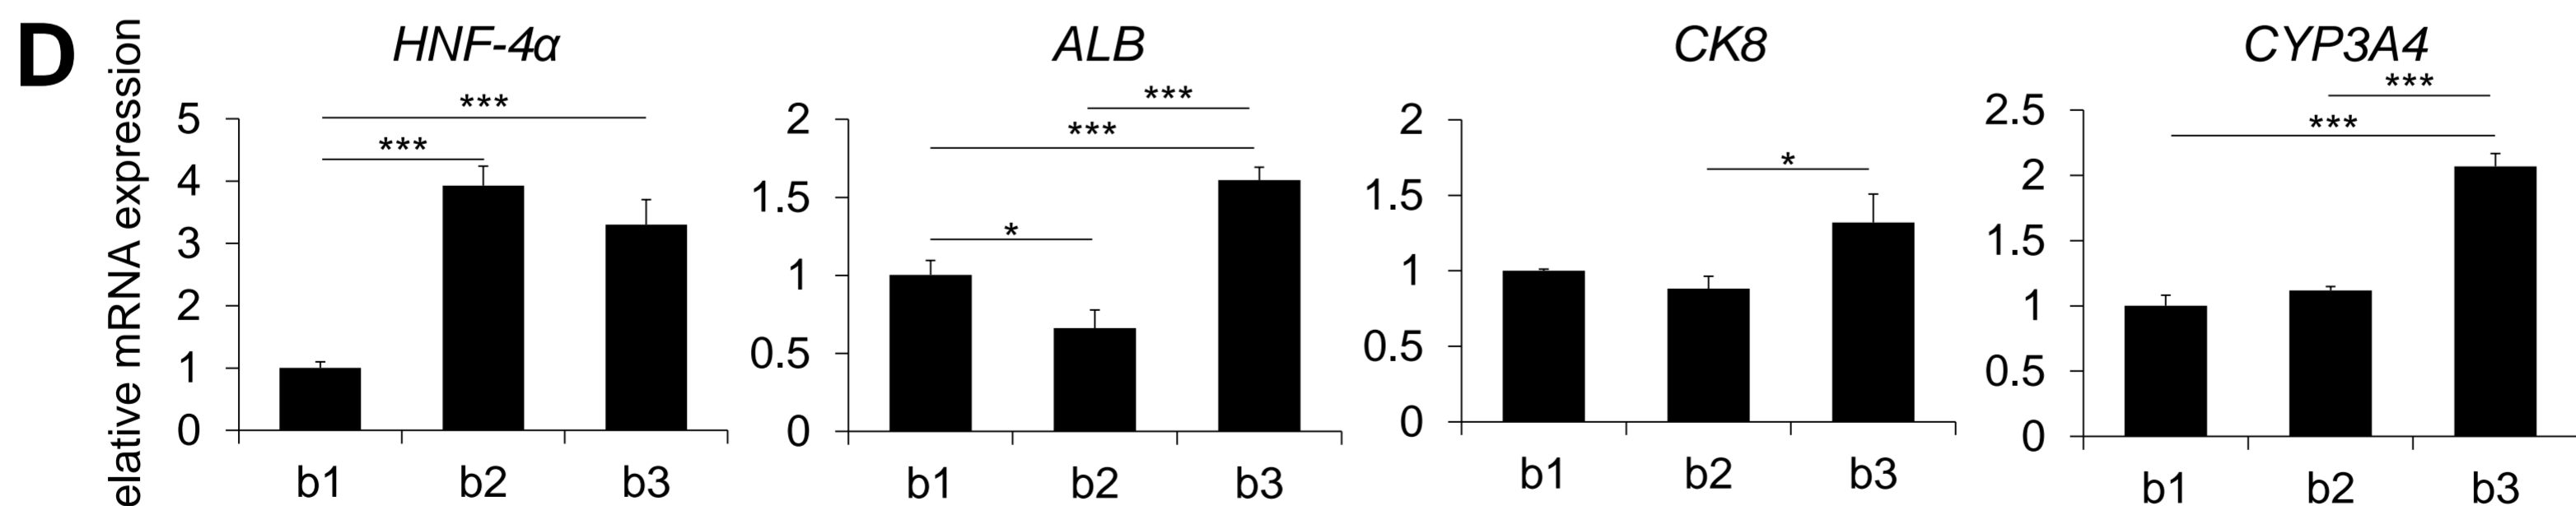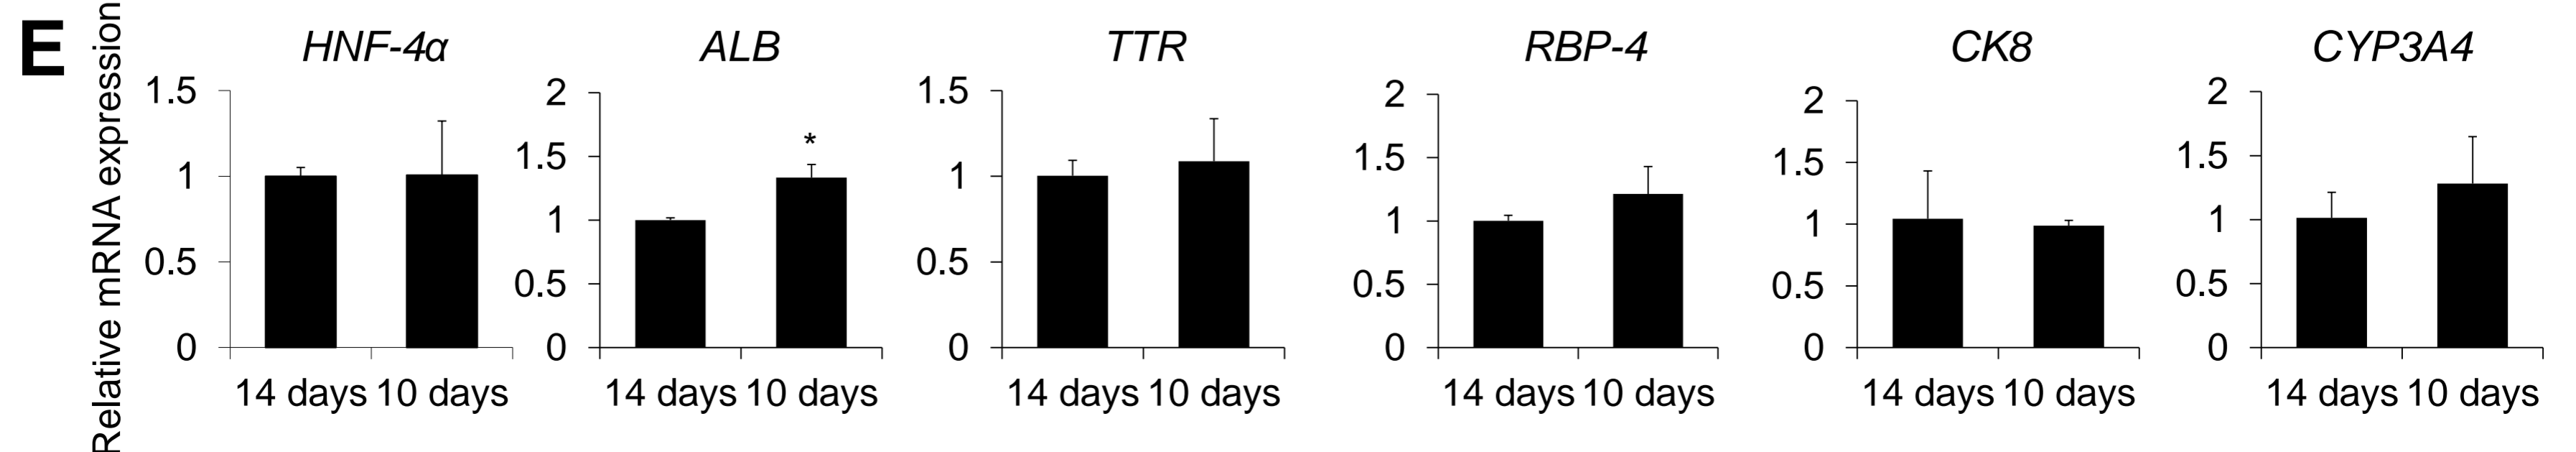

# Figure S2

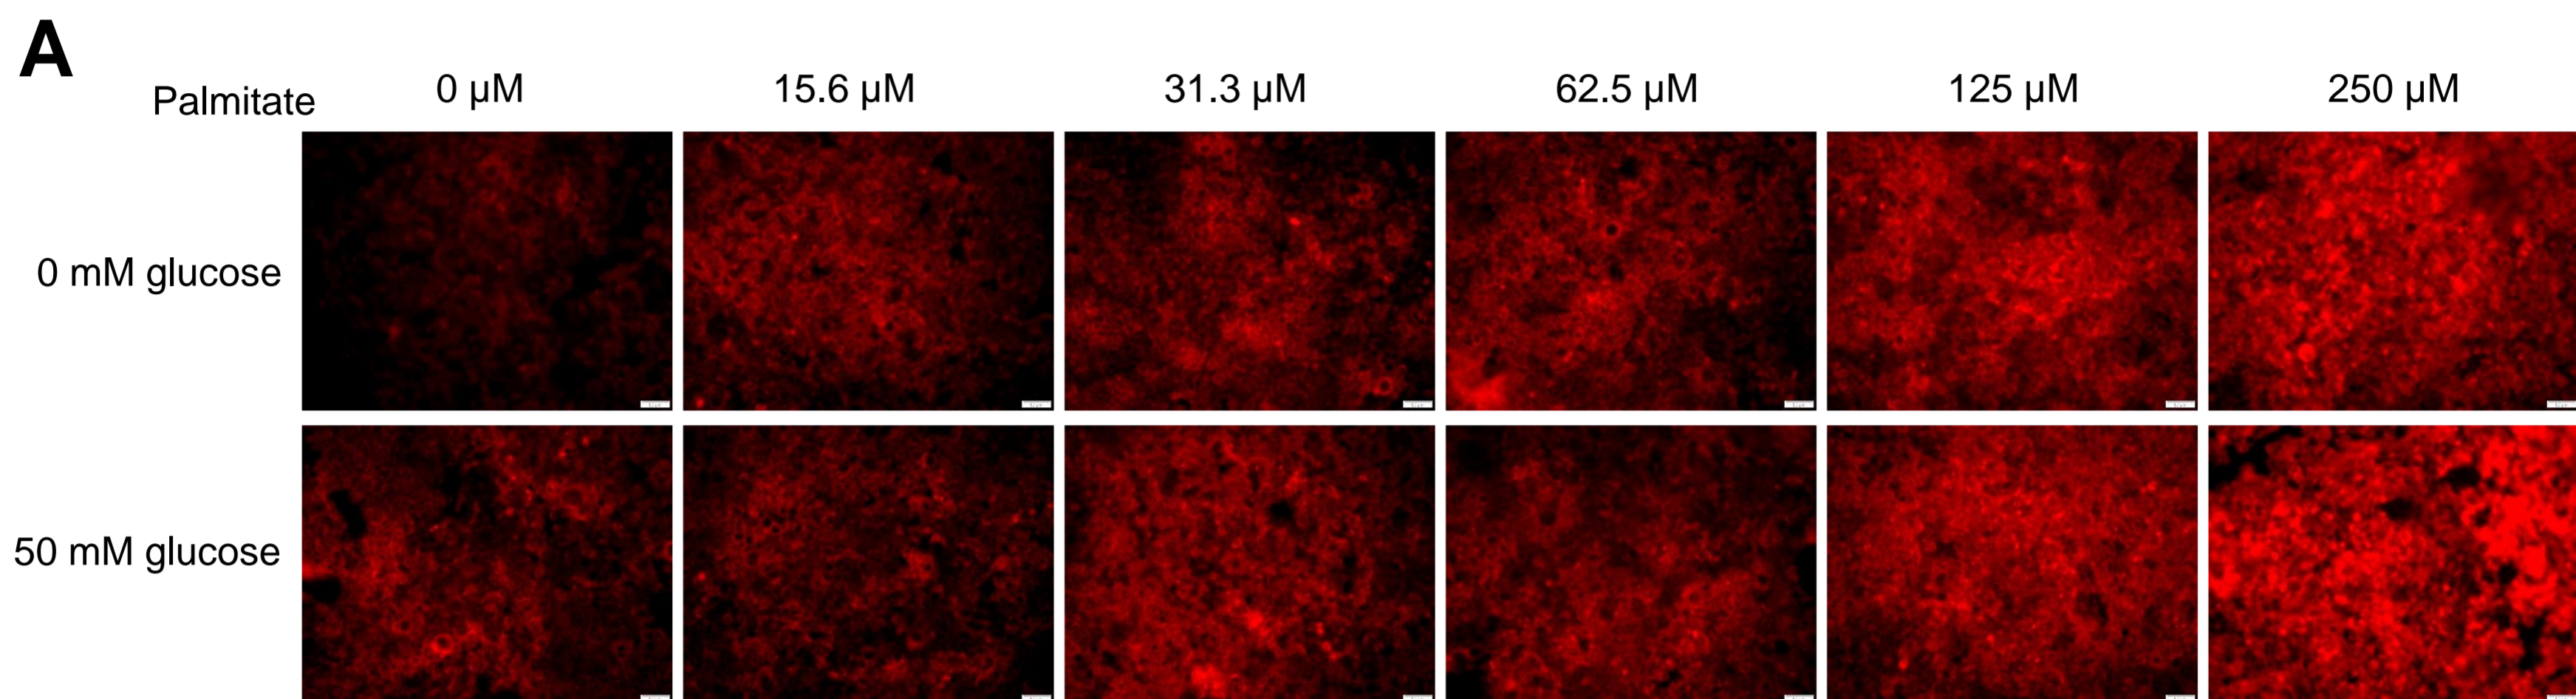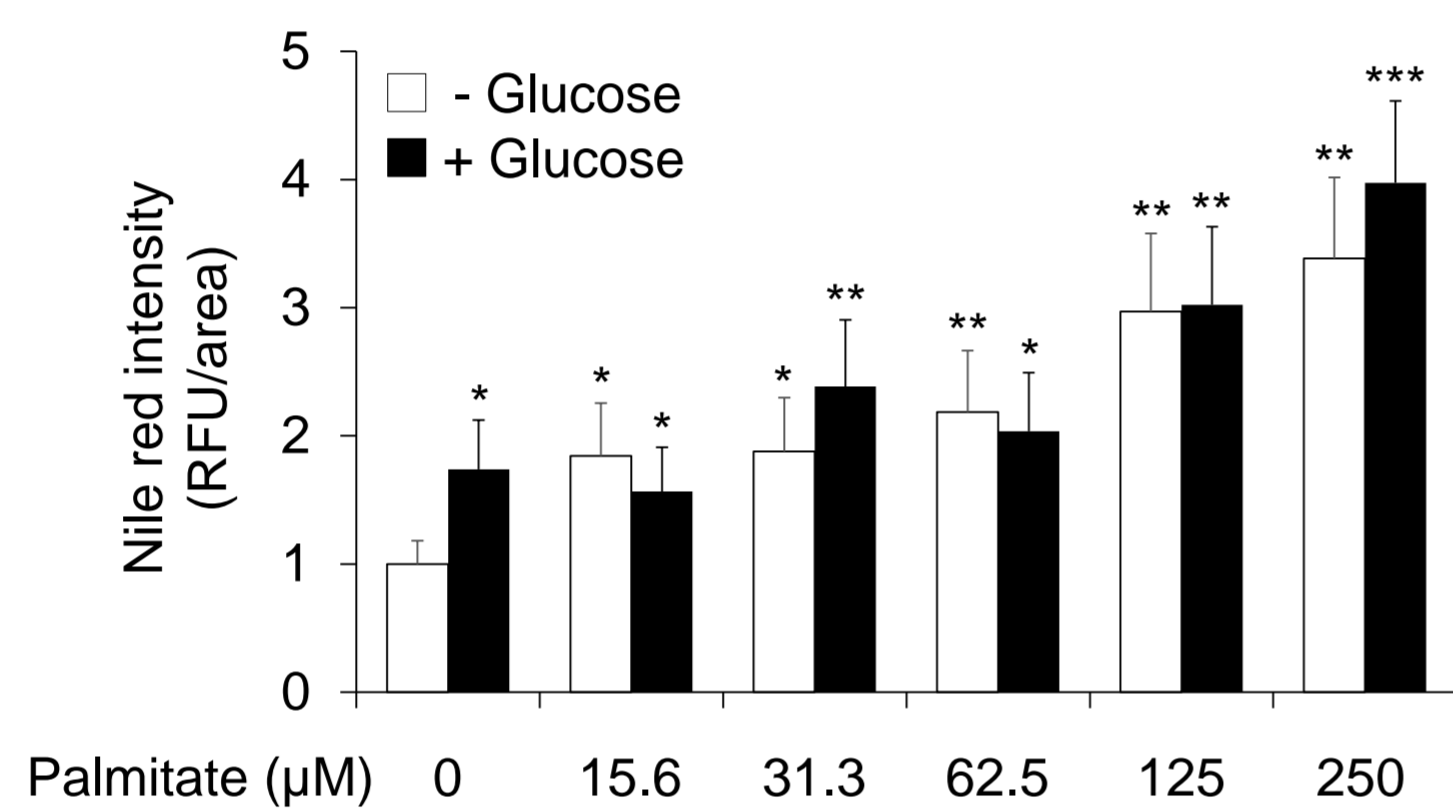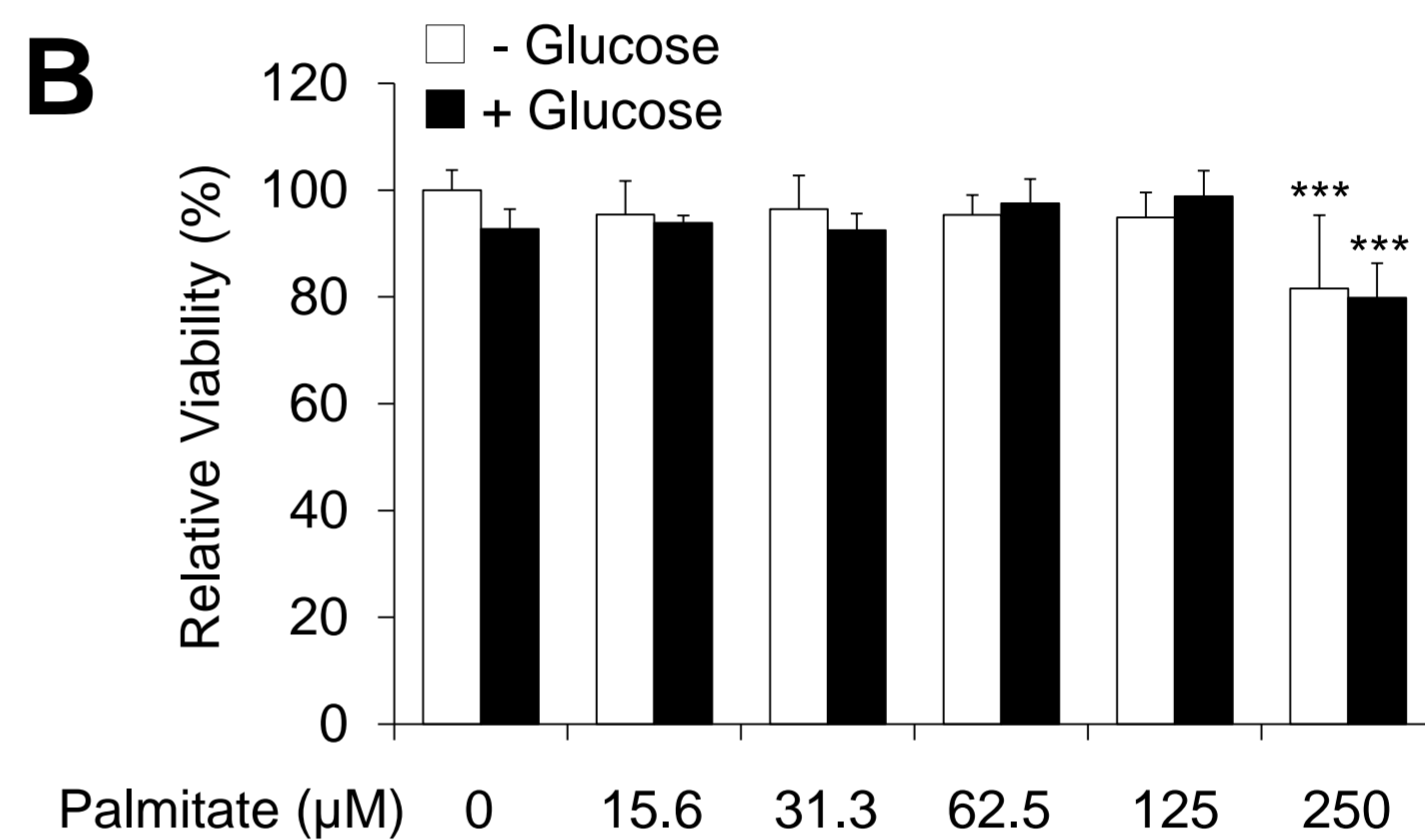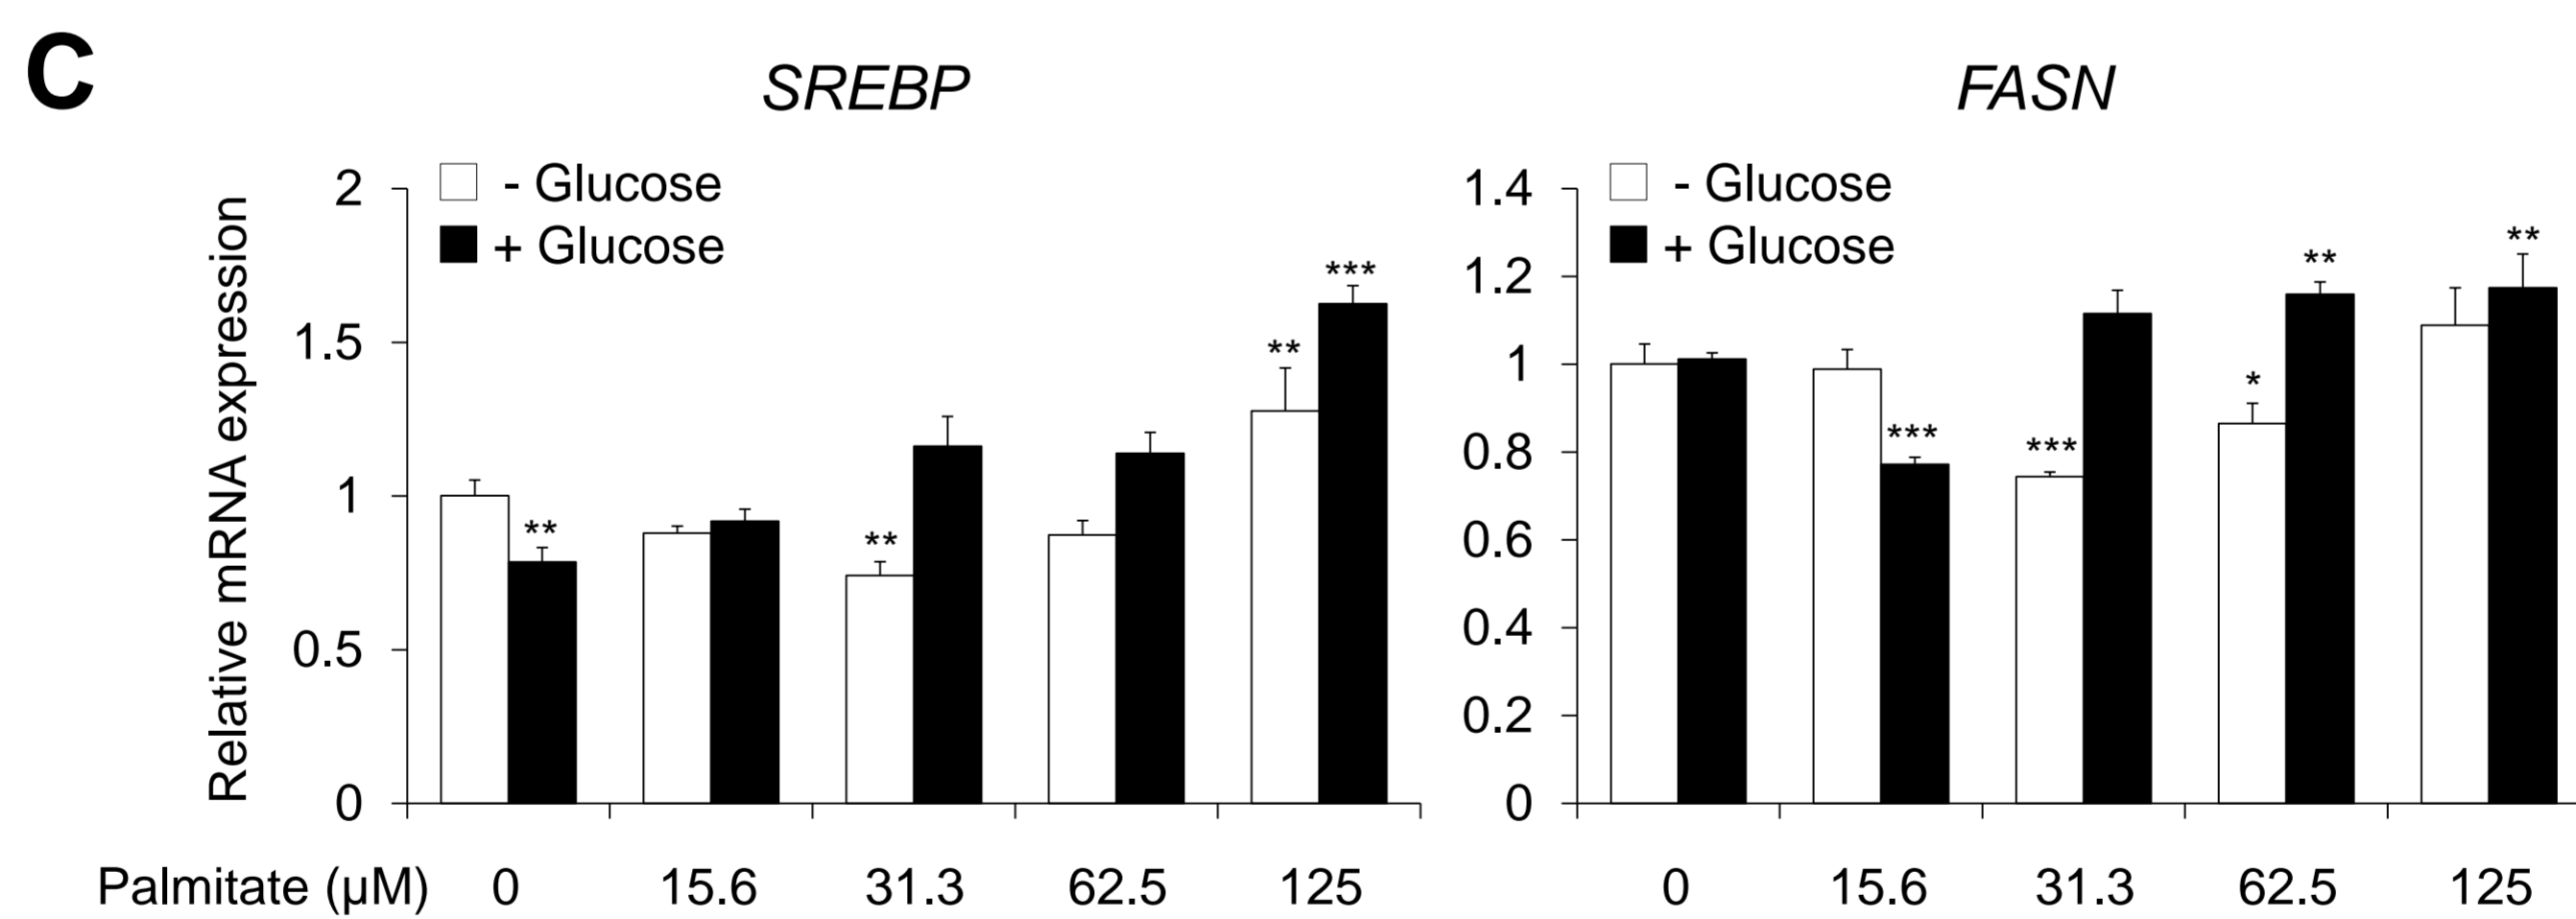

# Figure S3

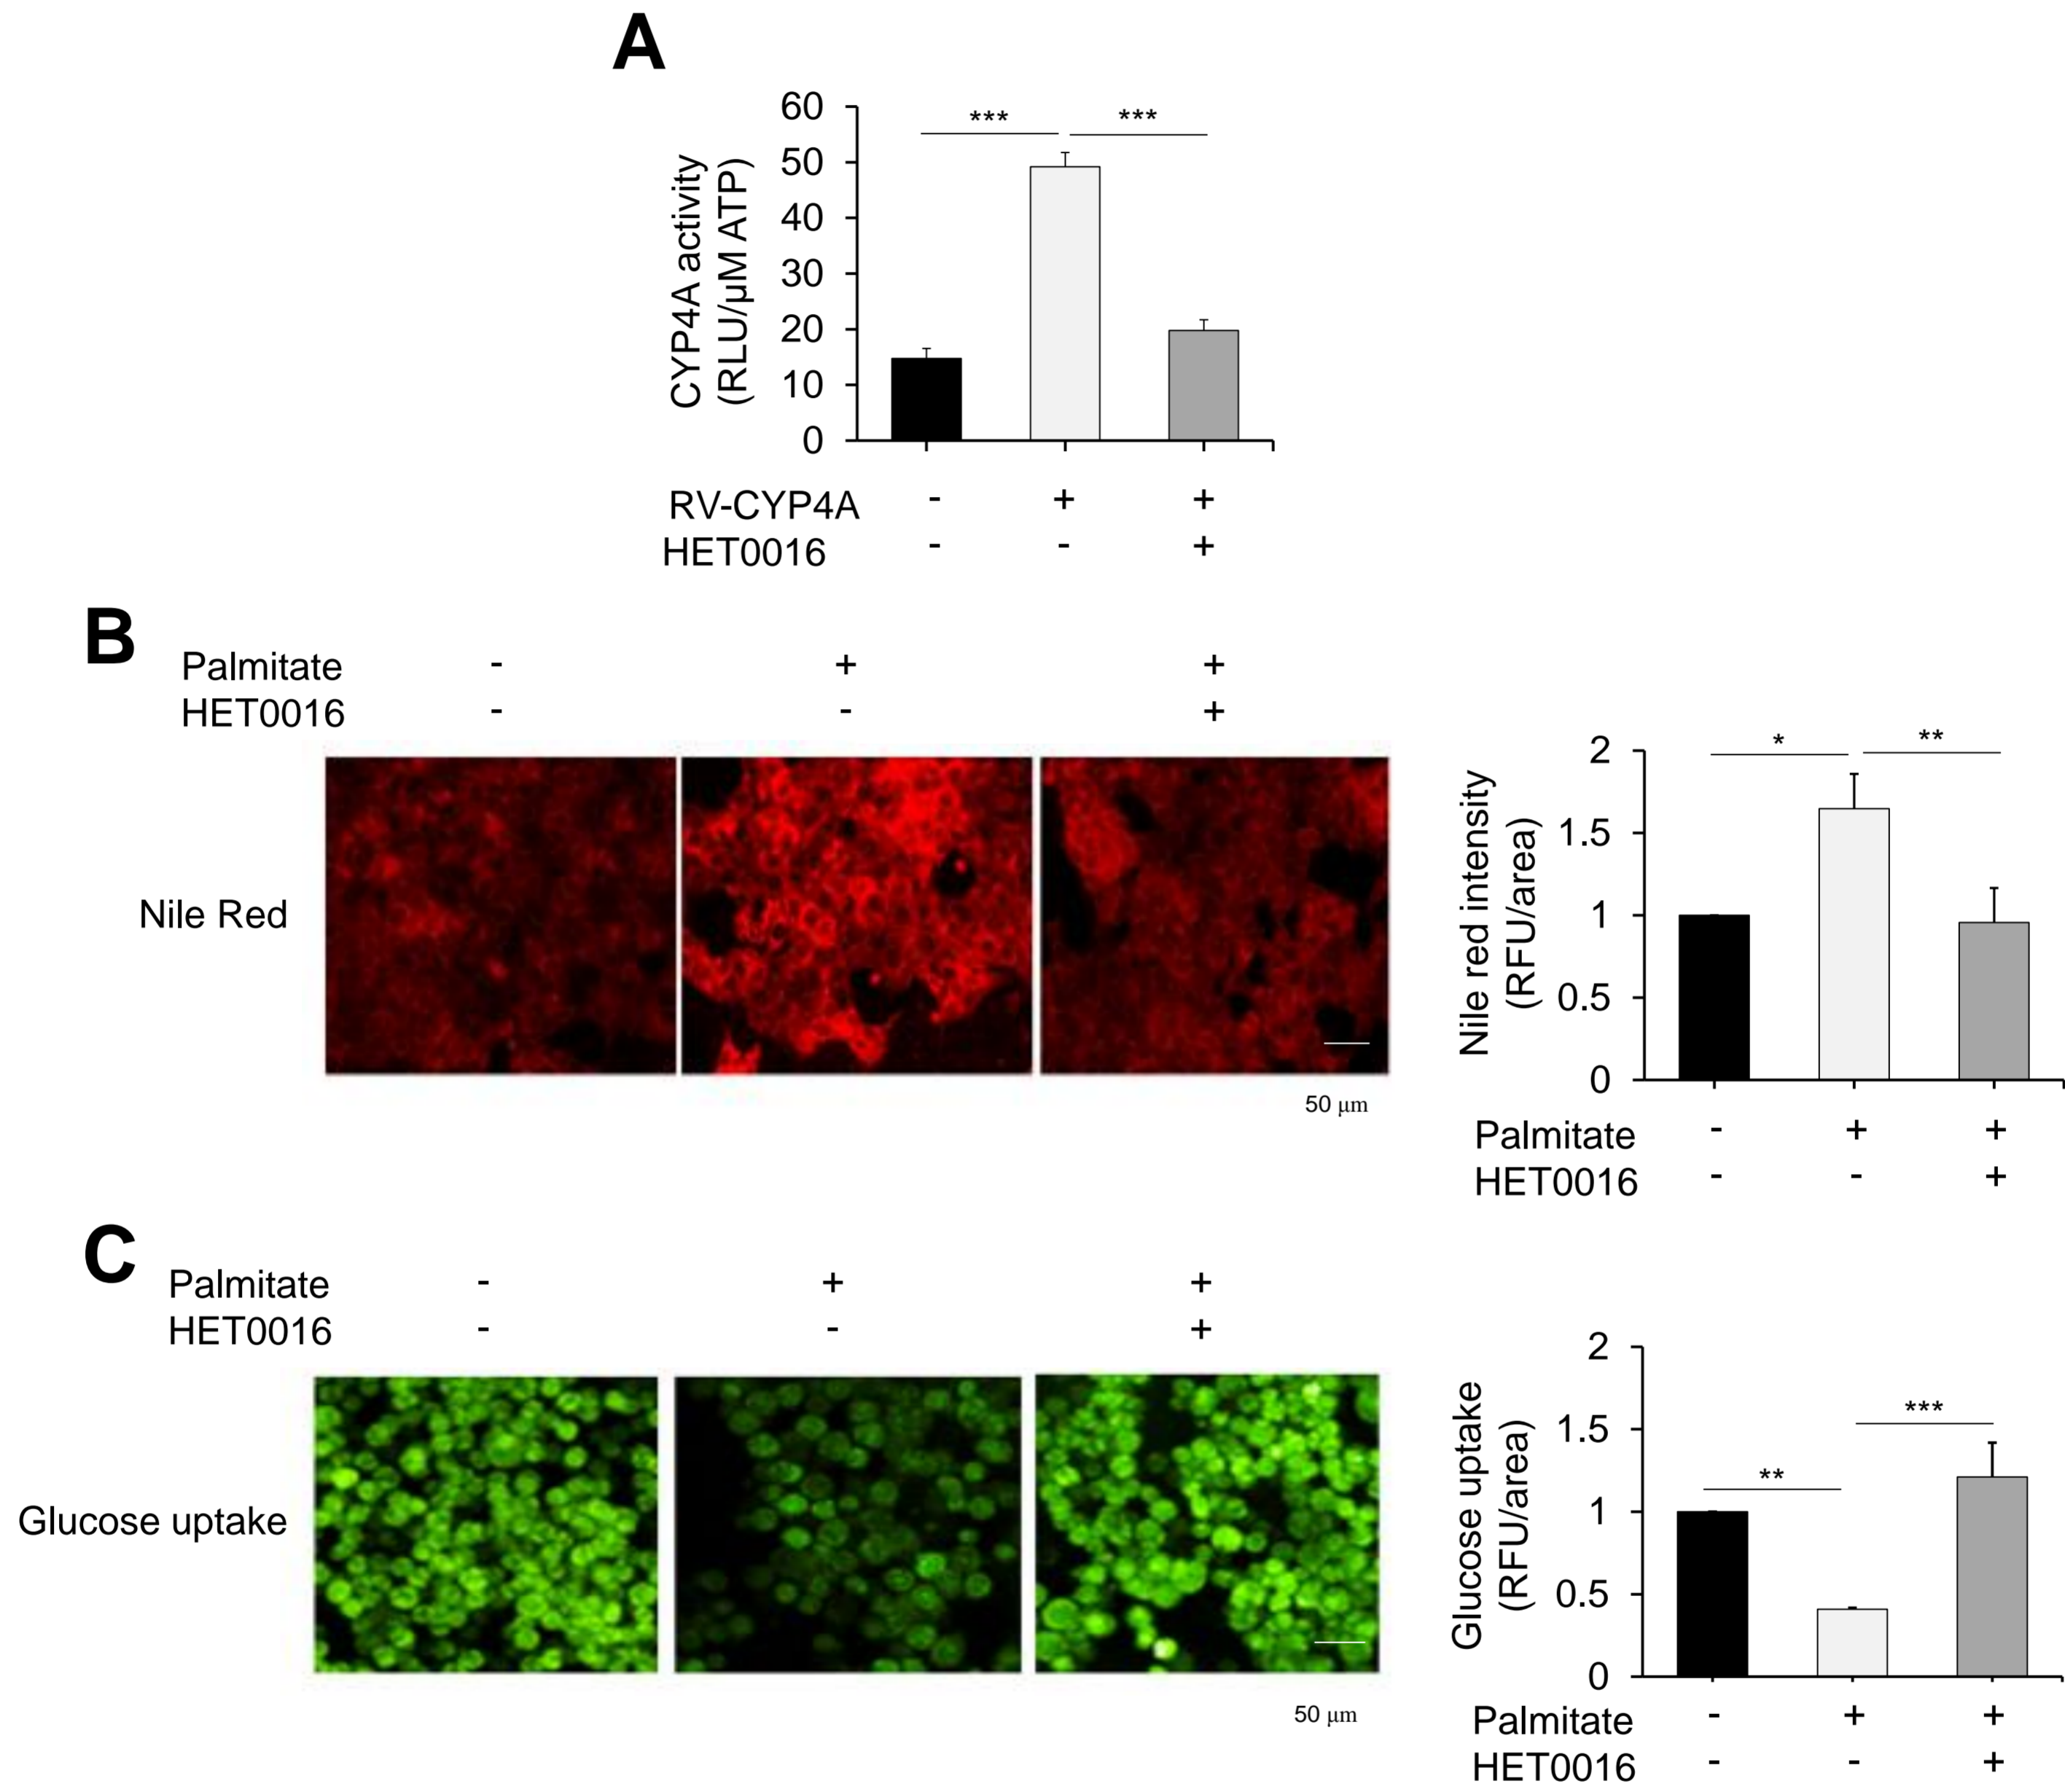

# Figure S4

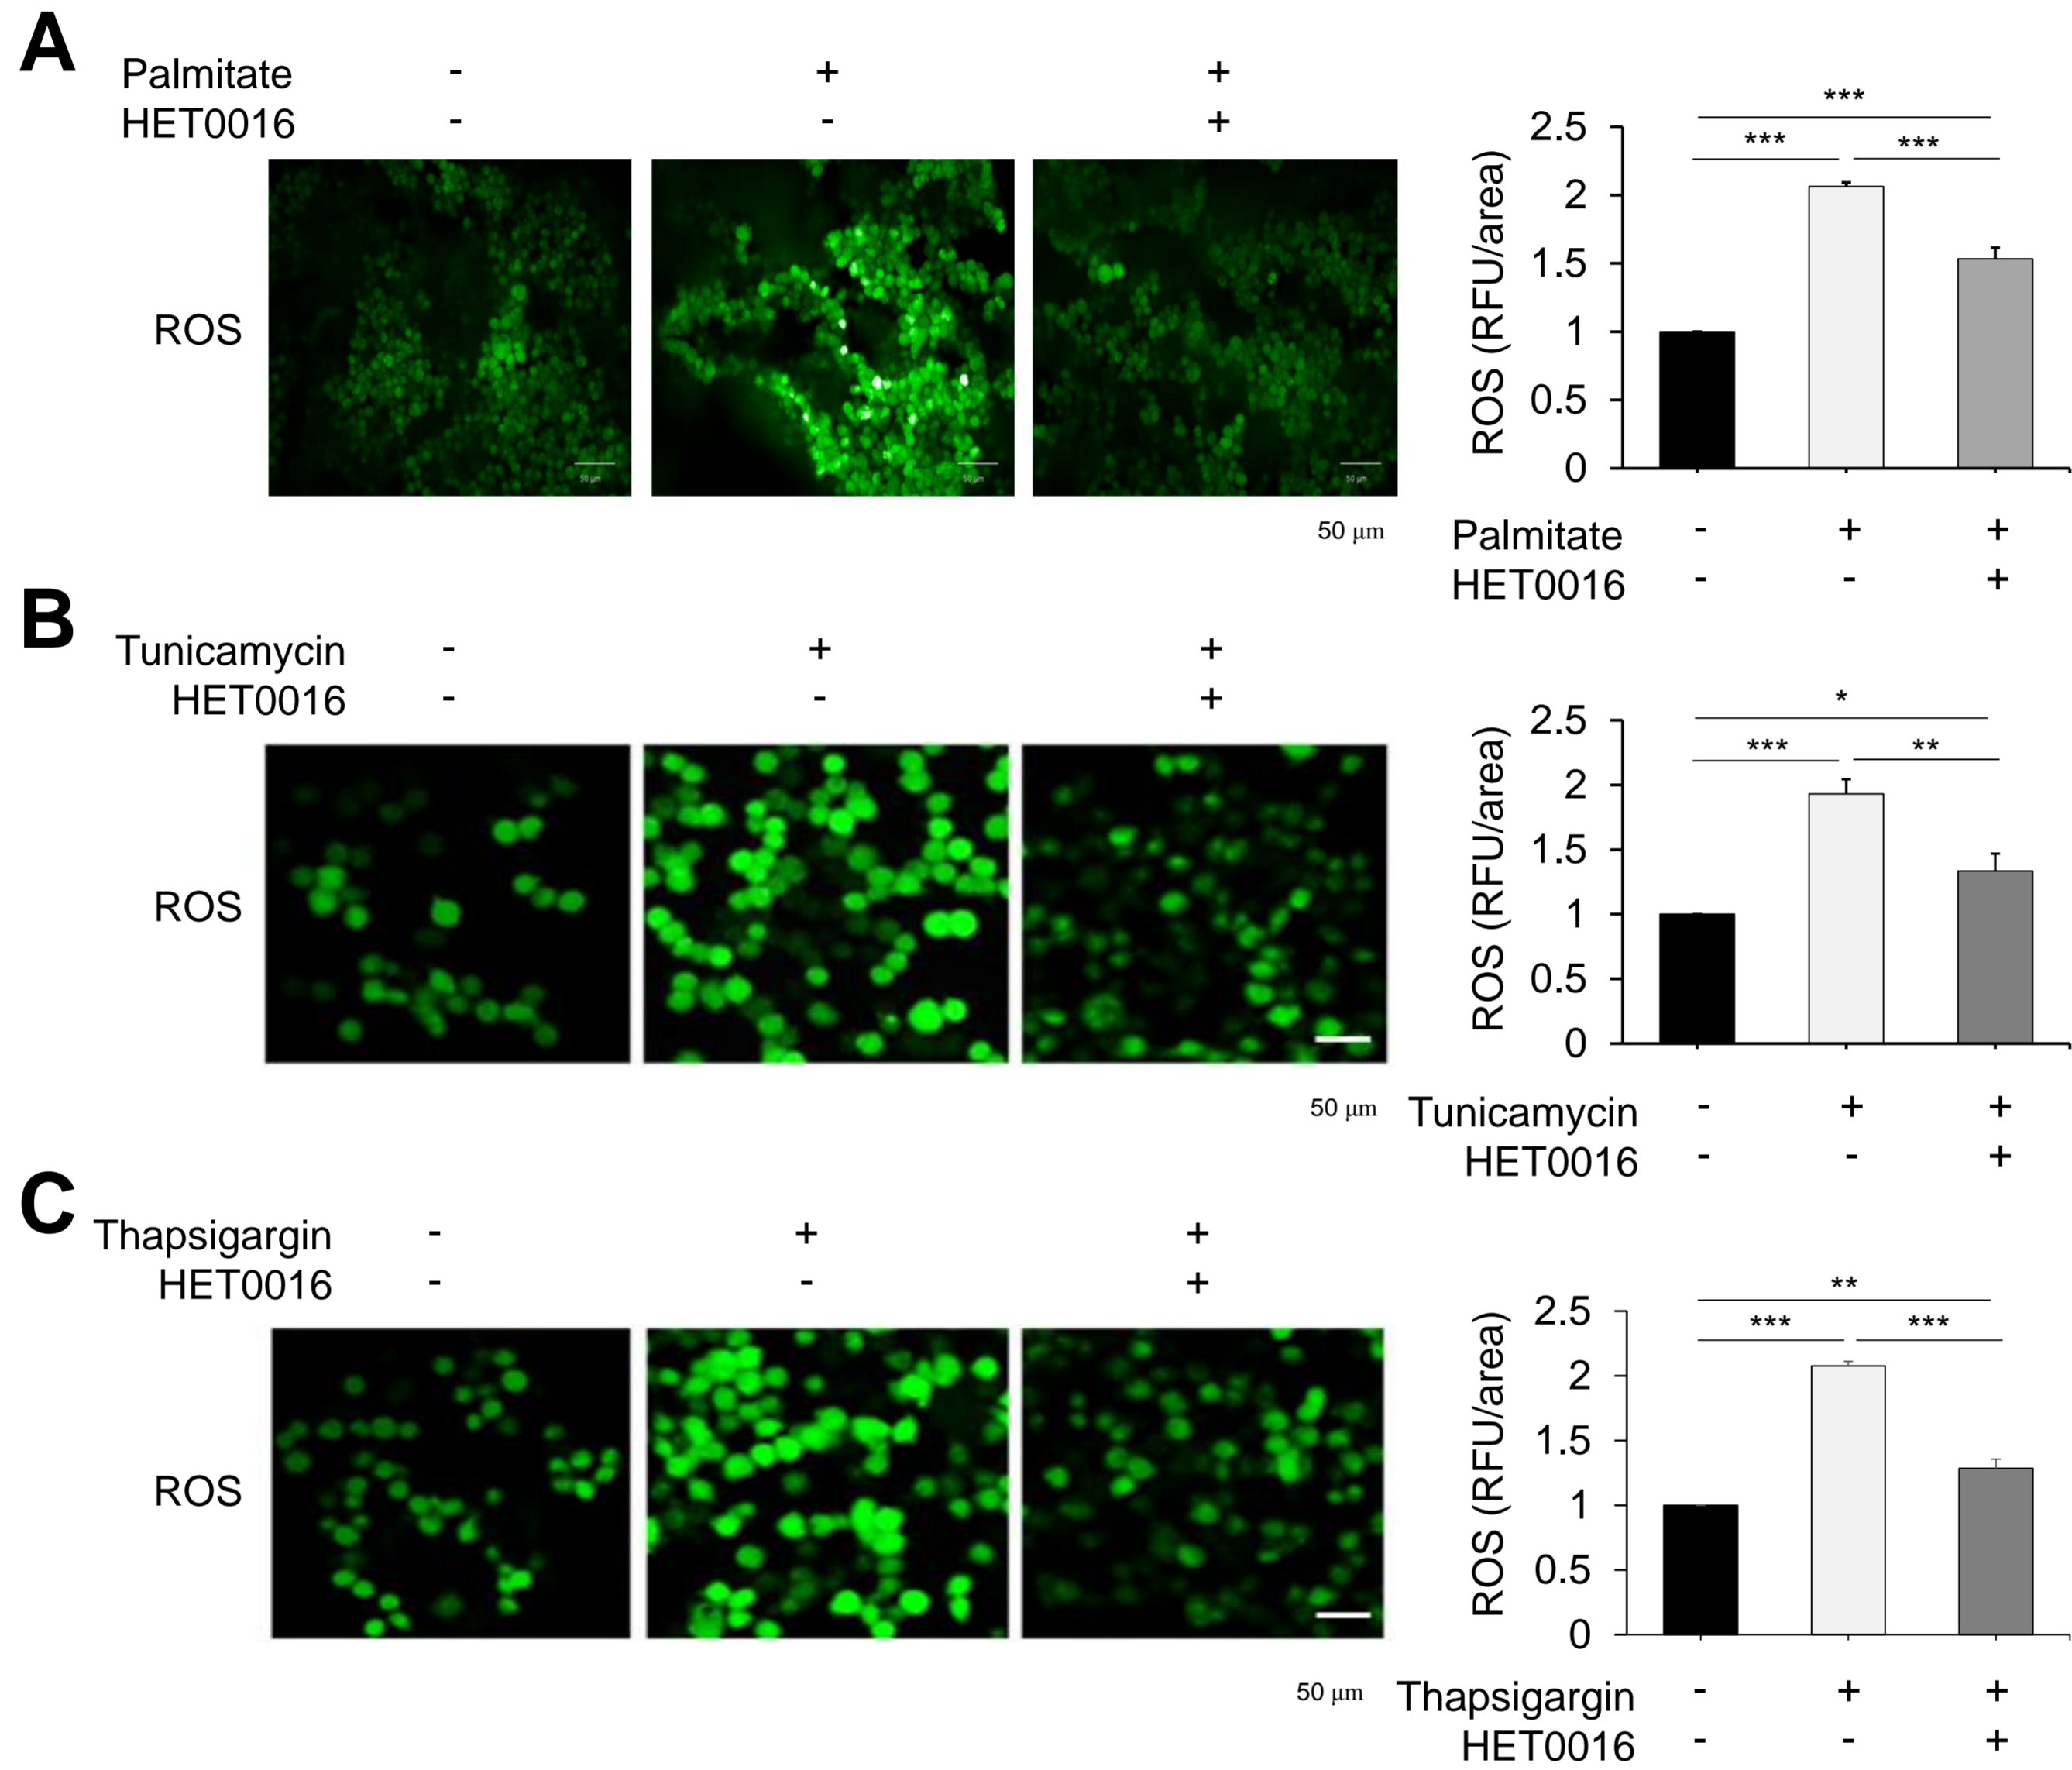

# Figure S5 (figure continued on next page)

for Fig. 2D

|             |   |   |   |
|-------------|---|---|---|
| Glucose     | - | + | - |
| Palmitate   | - | + | - |
| Tunicamycin | - | - | + |

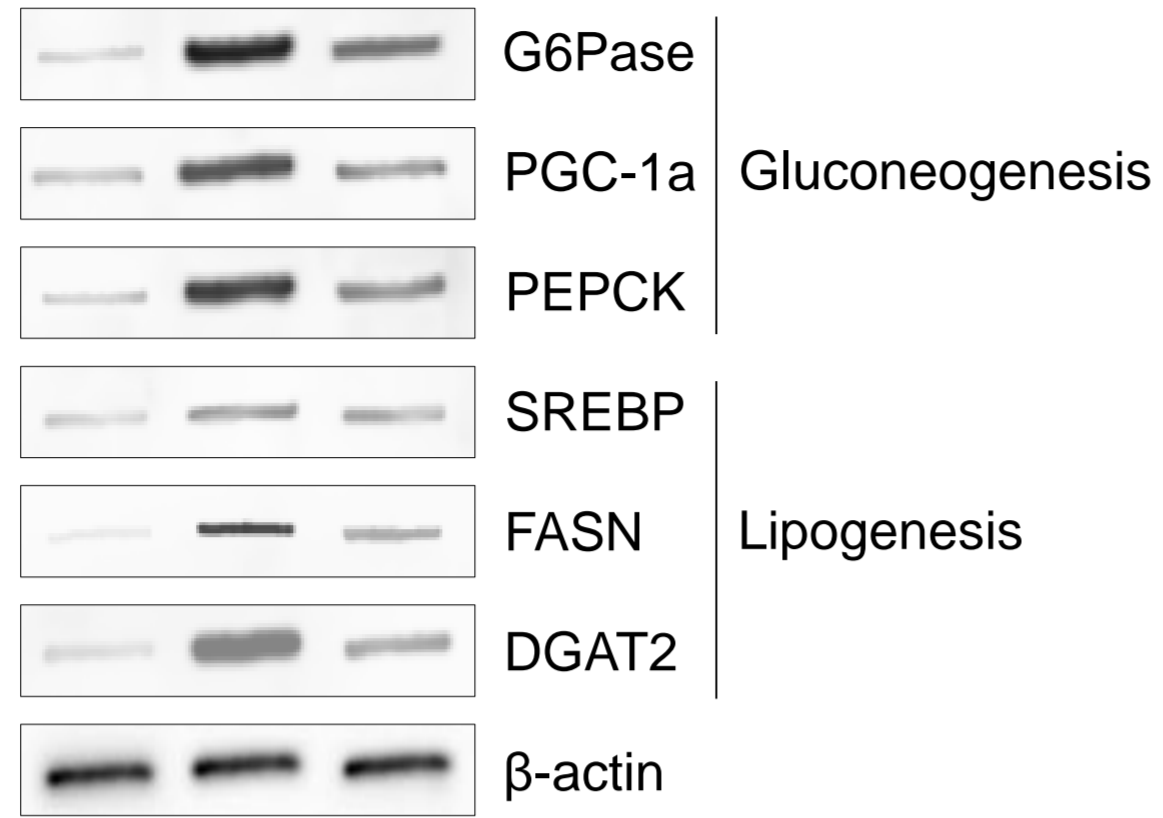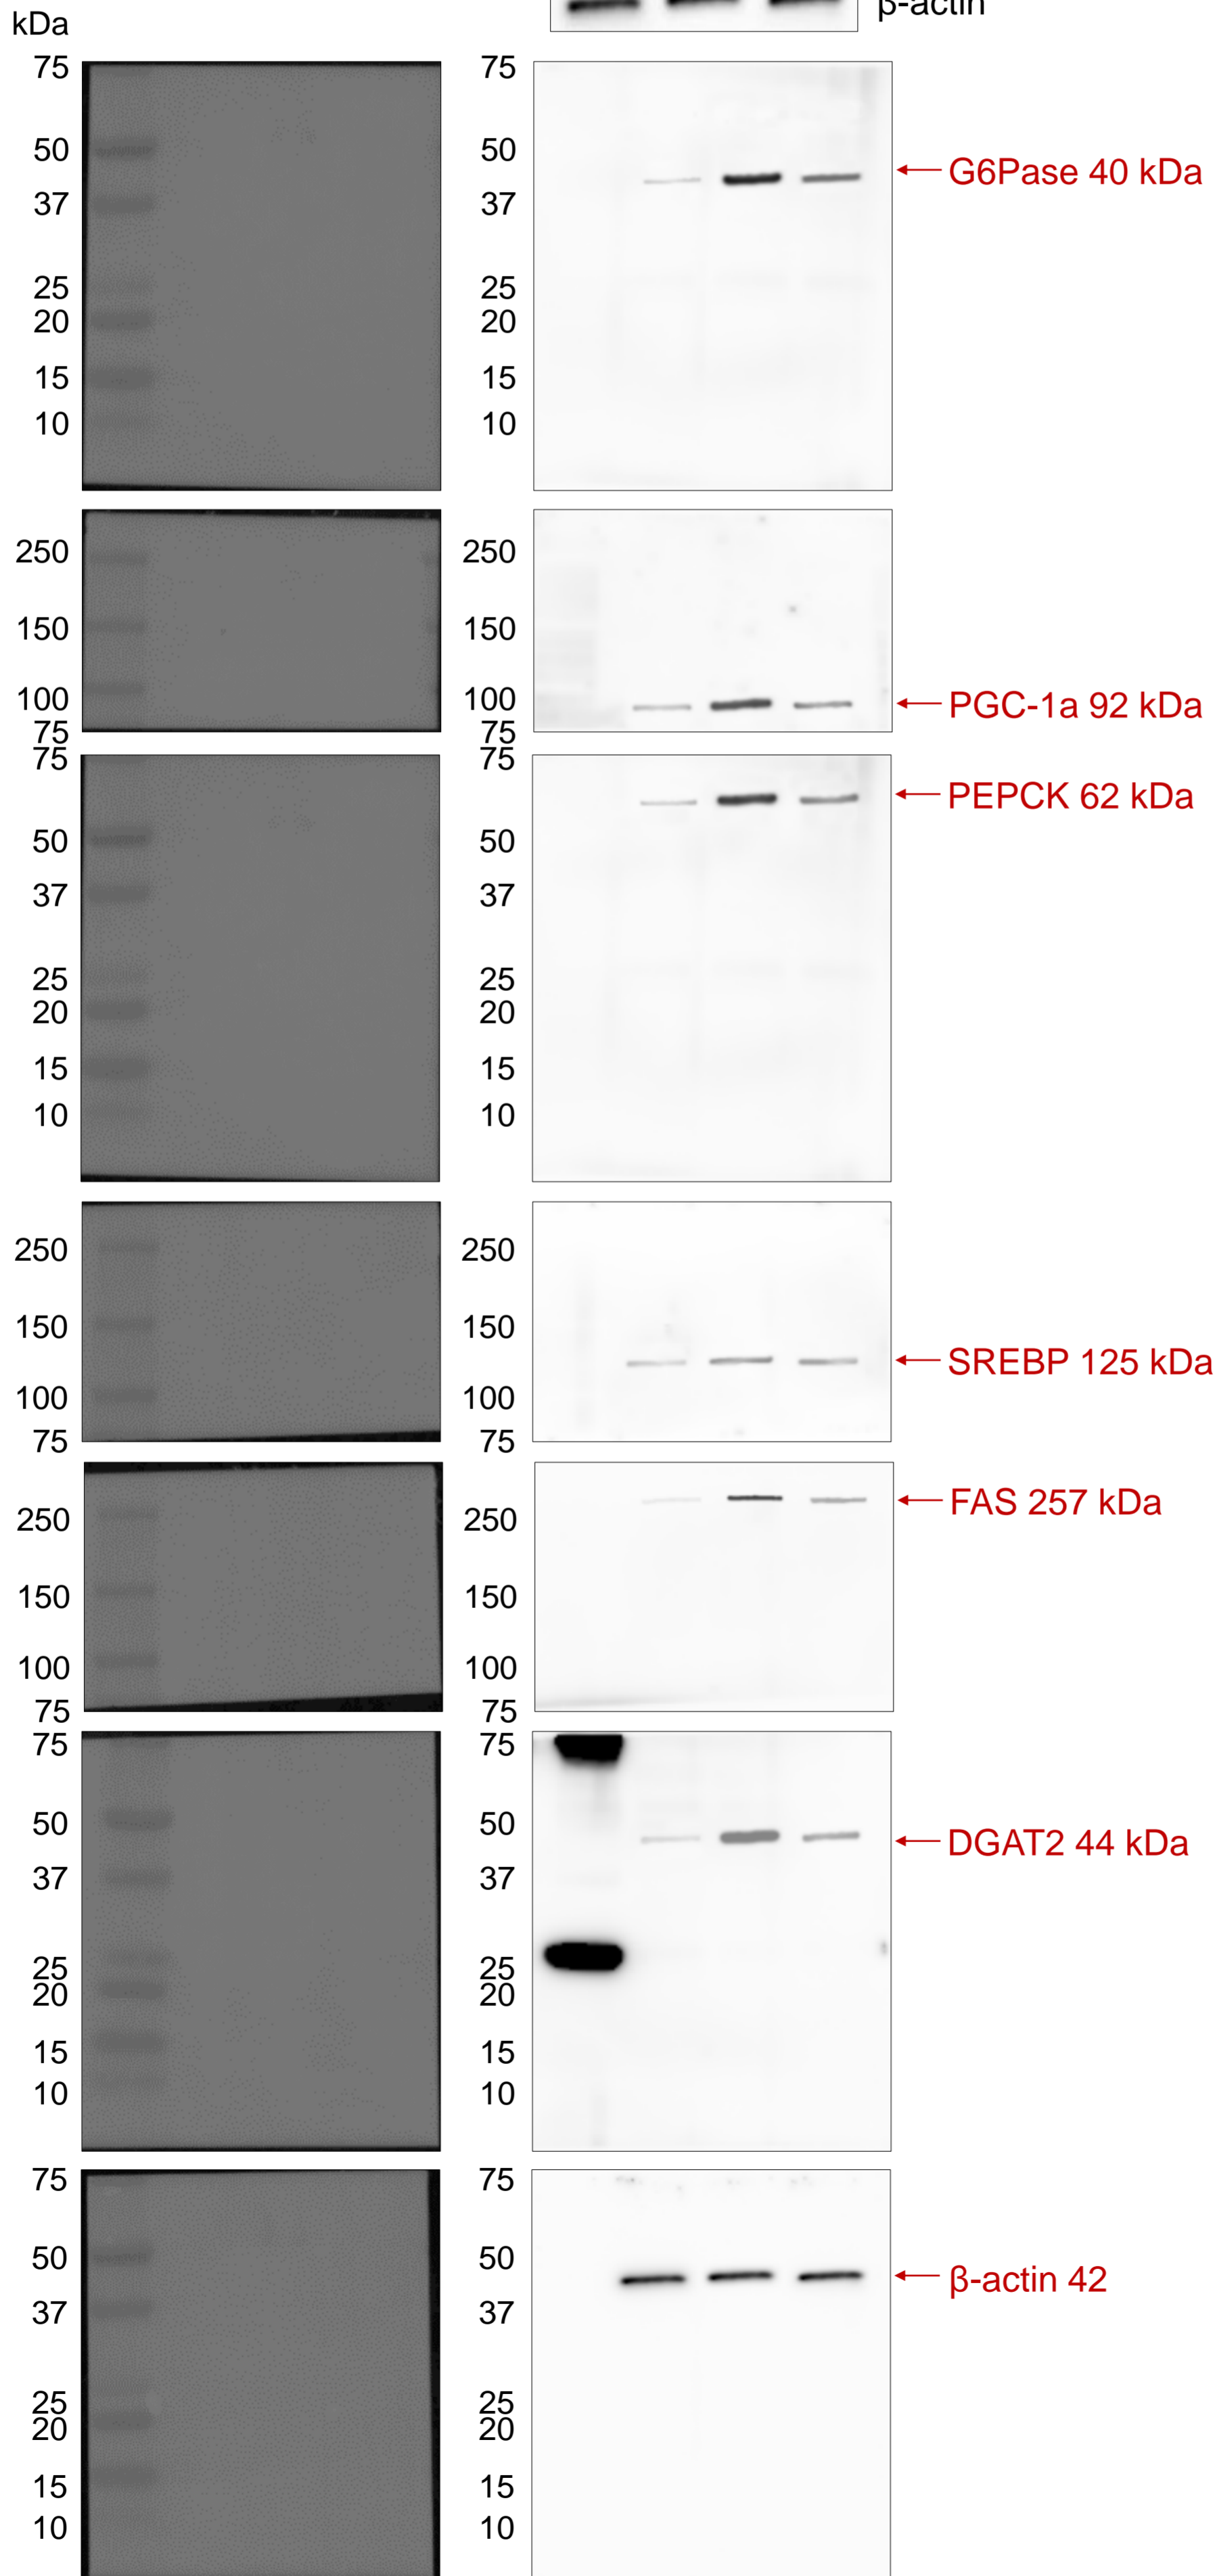

for Fig. 2H

|             |   |   |   |
|-------------|---|---|---|
| Glucose     | - | + | - |
| Palmitate   | - | + | - |
| Tunicamycin | - | - | + |

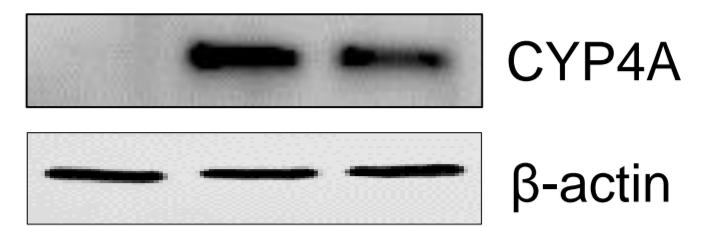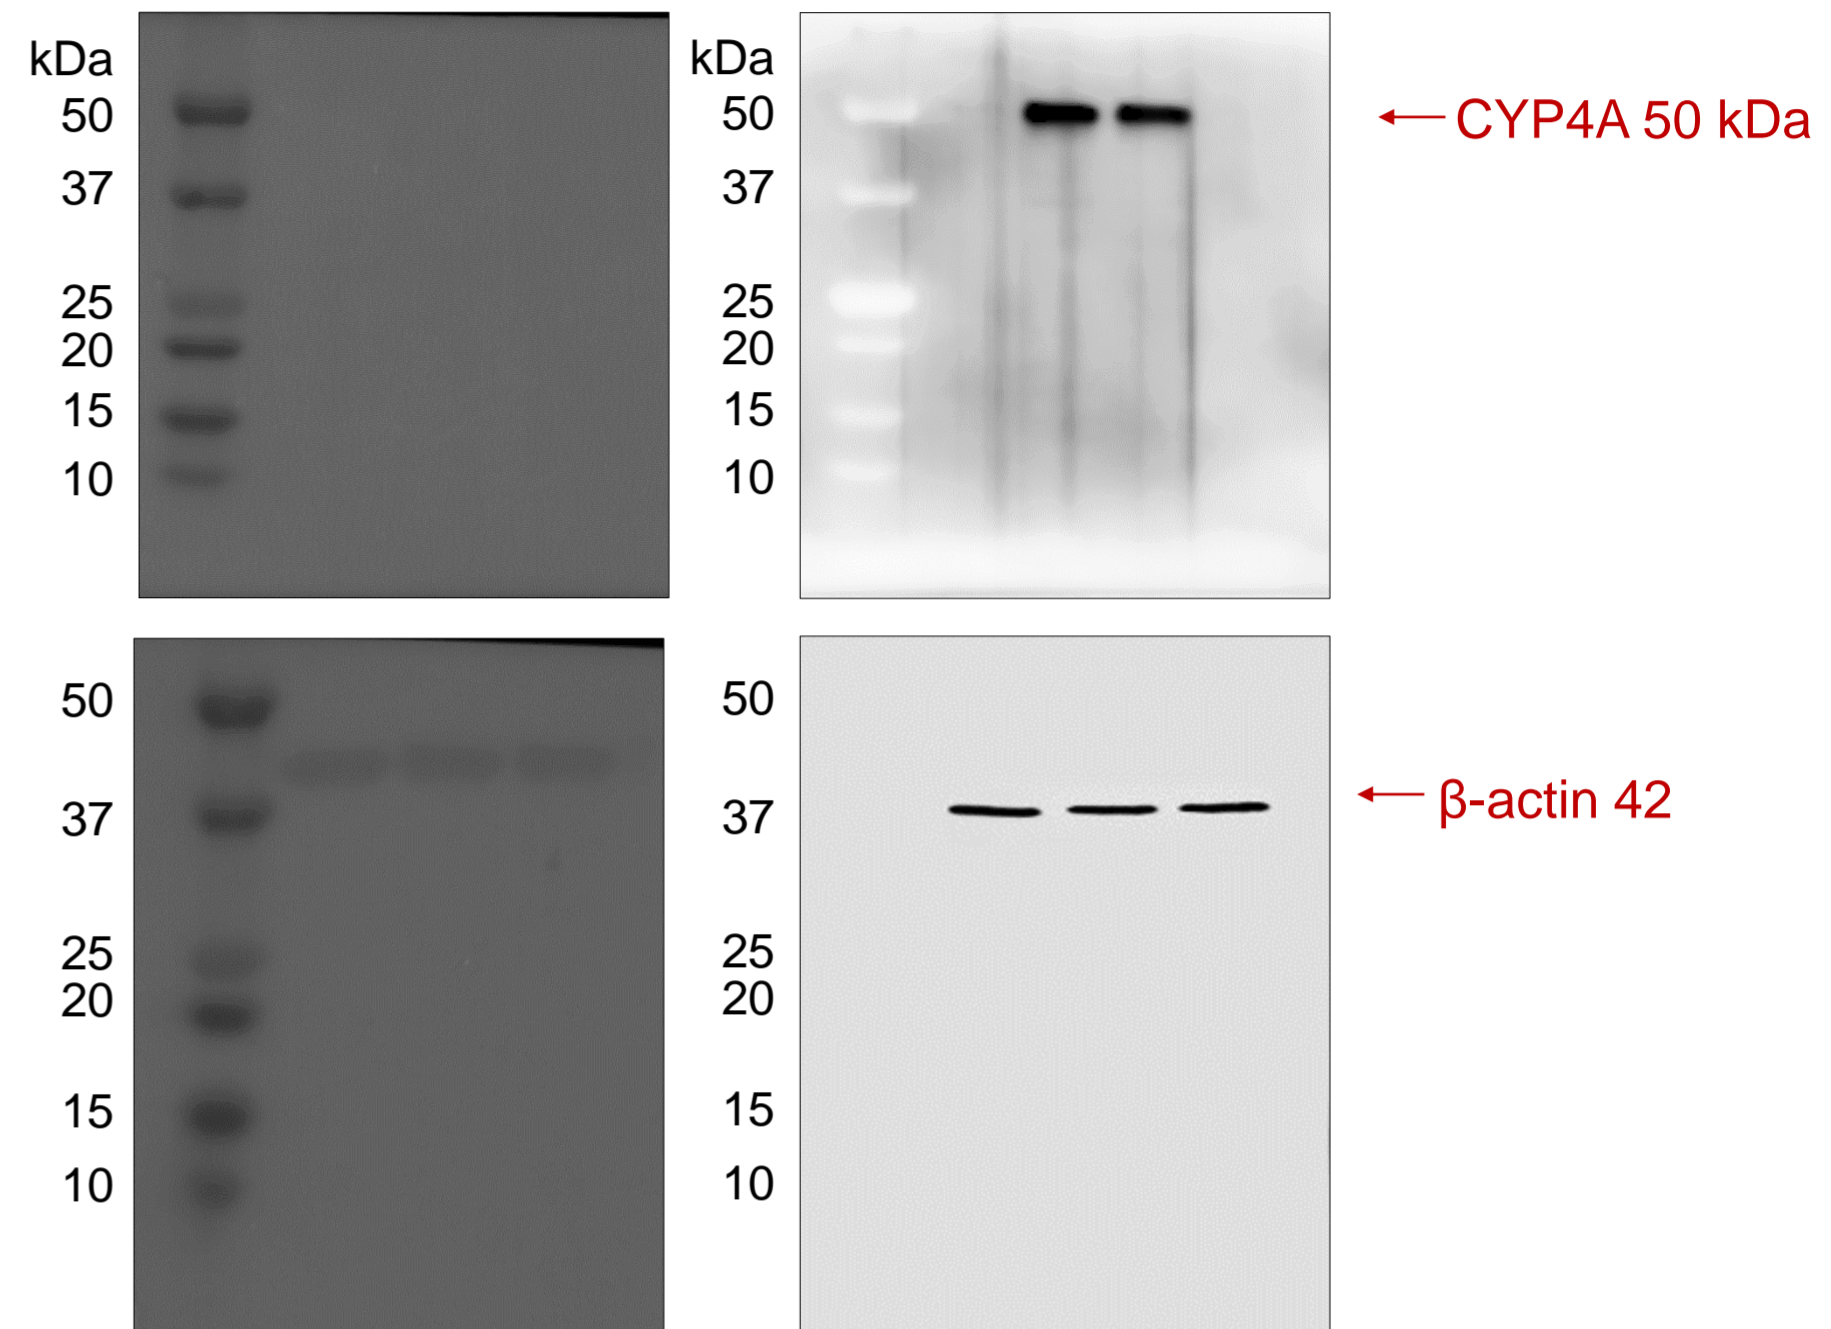

for Fig. 2J

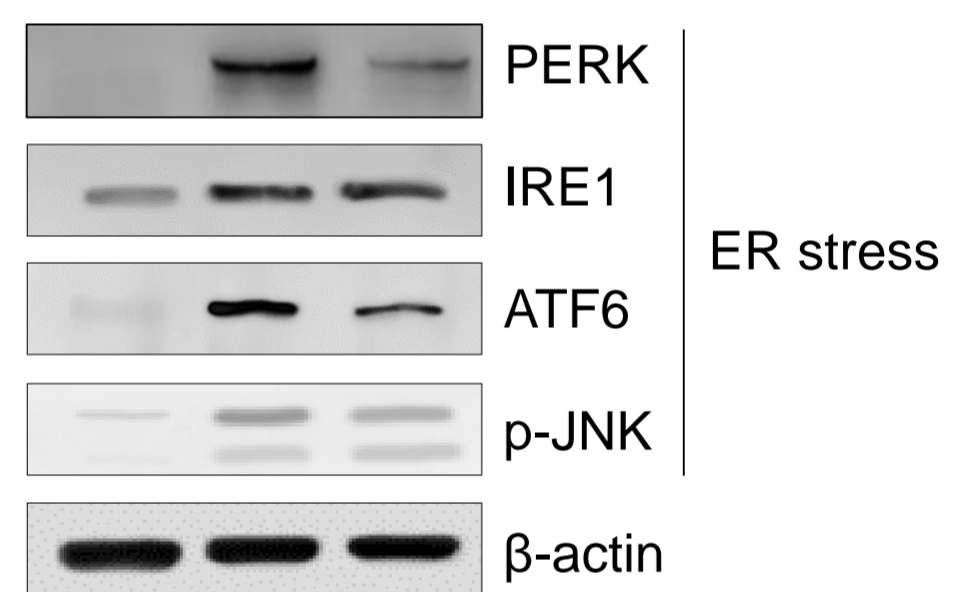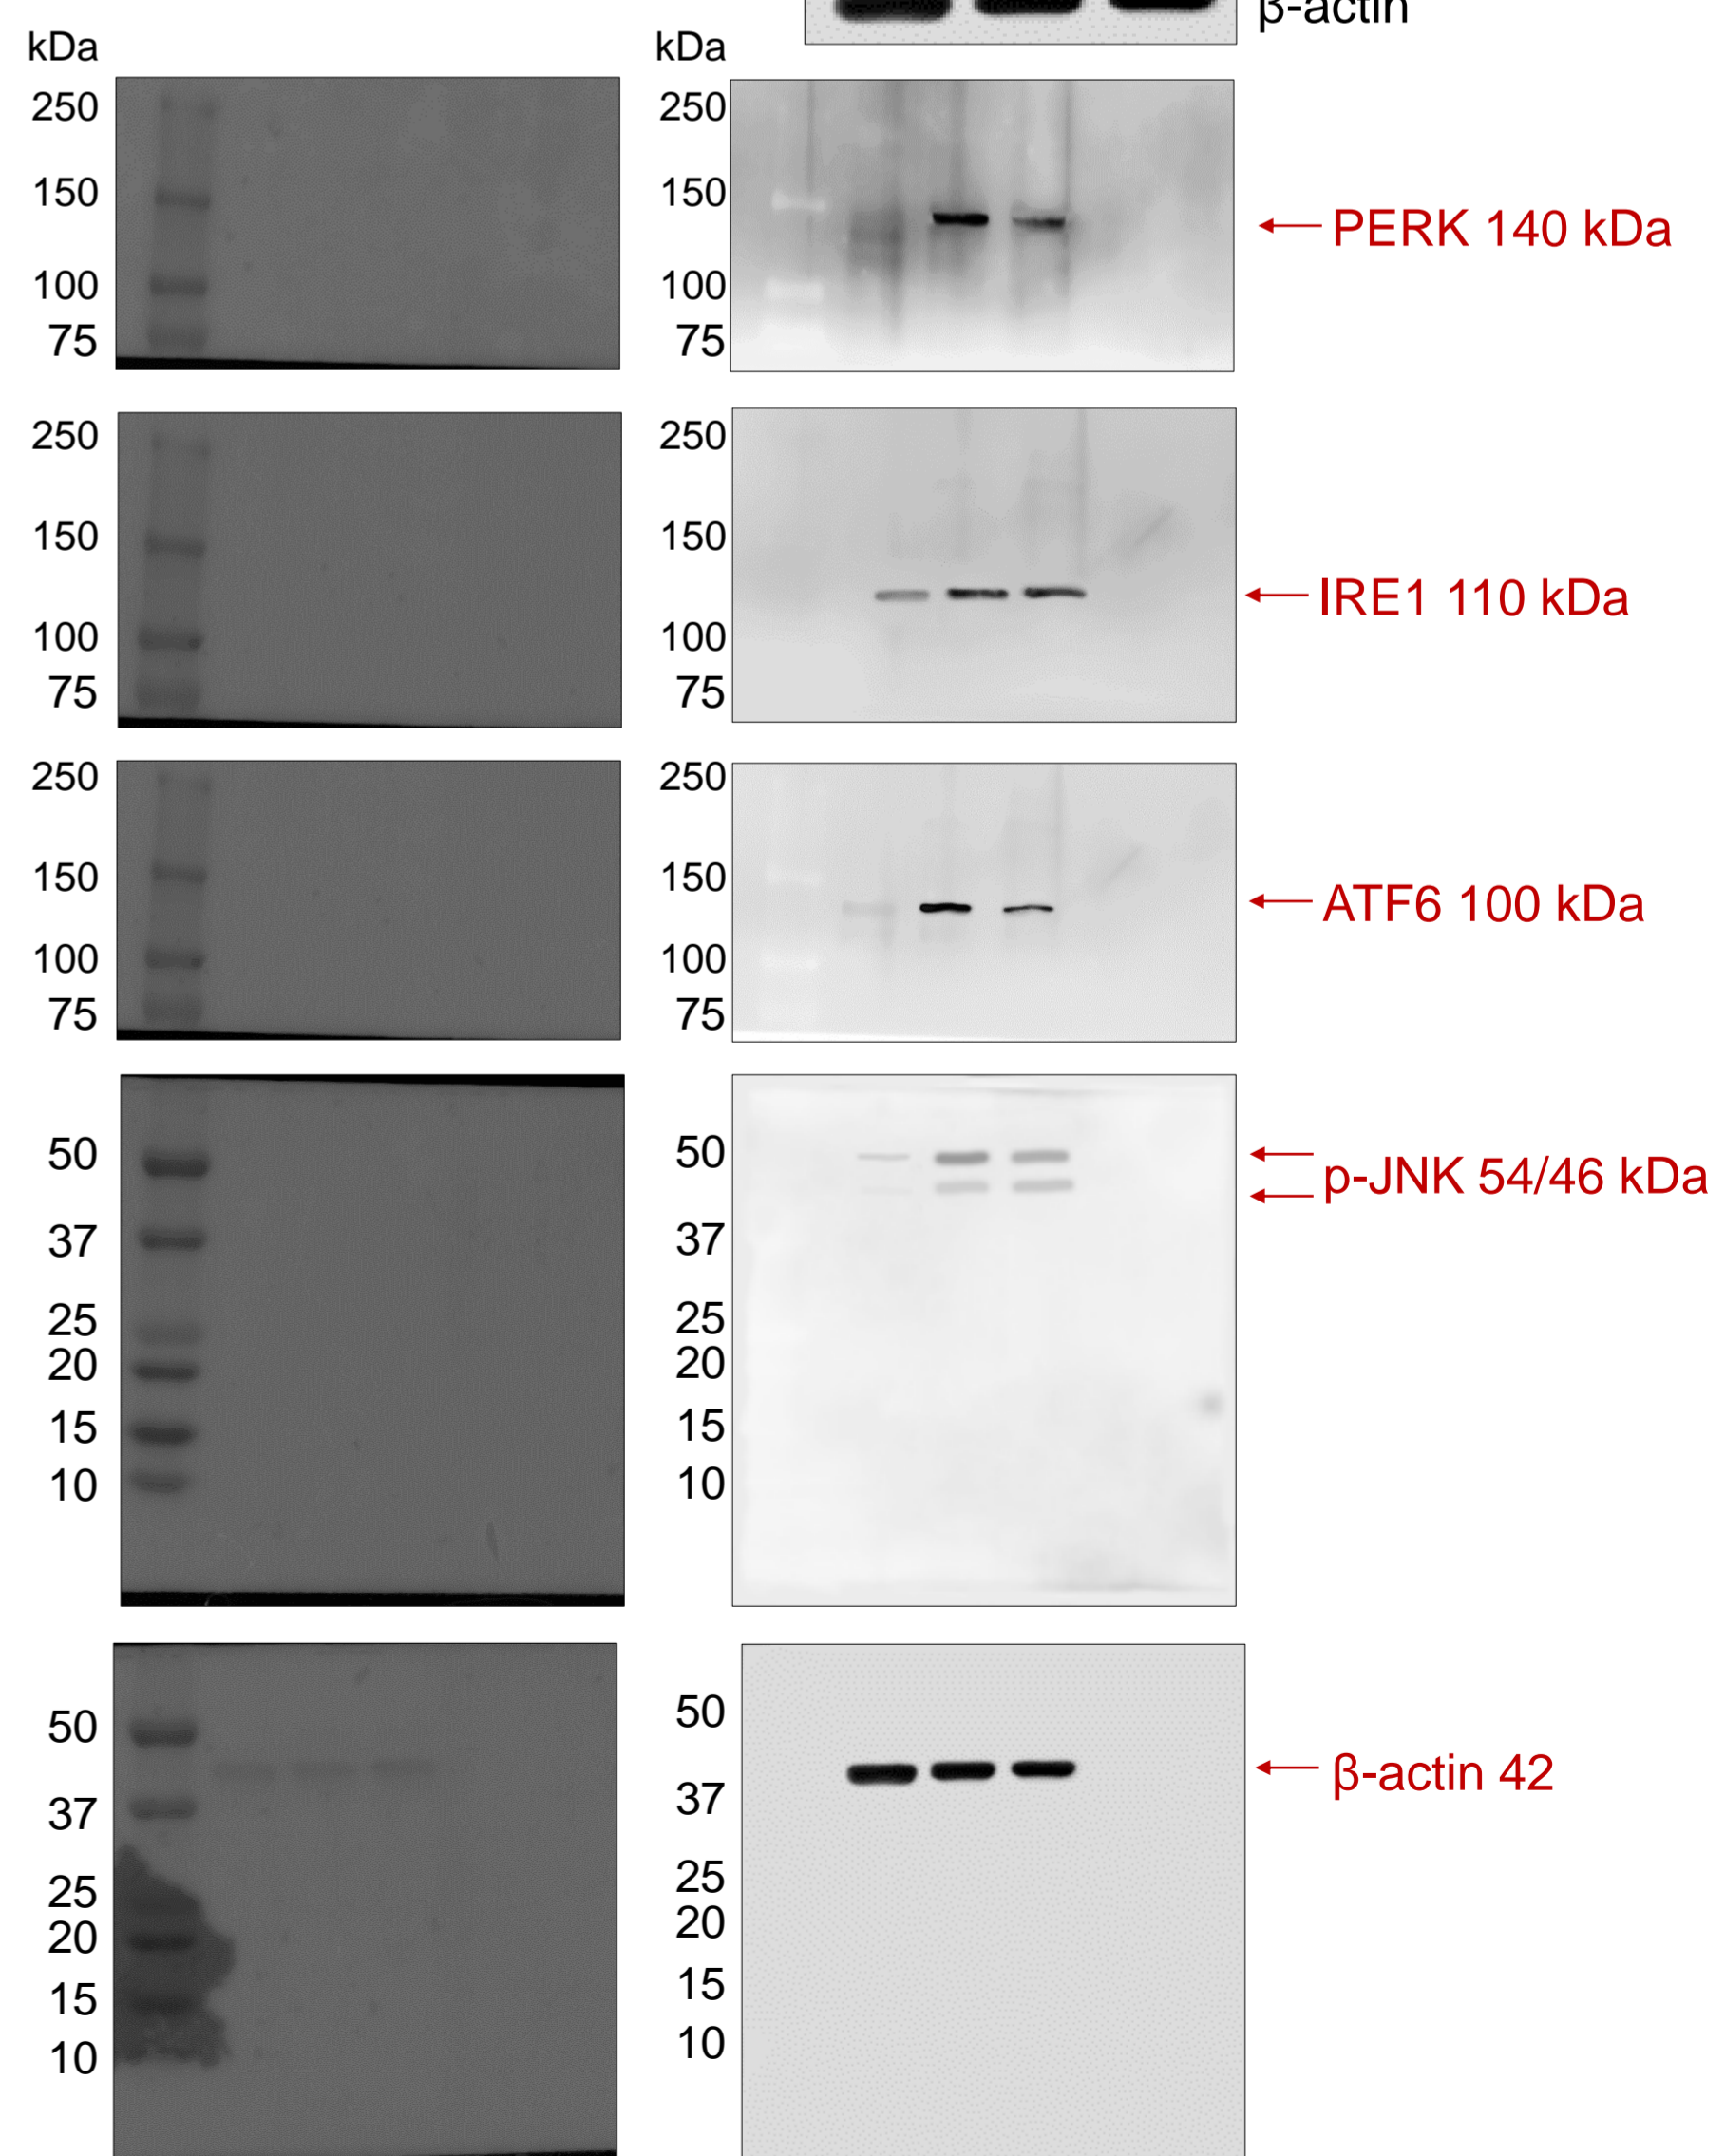

# Figure S5 (figure continued on next page)

for Fig. 3D

|           |   |   |   |   |
|-----------|---|---|---|---|
| RV-CYP4A  | - | + | - | - |
| Glucose   | - | - | + | + |
| Palmitate | - | - | + | + |
| siCYP4A   | - | - | - | + |

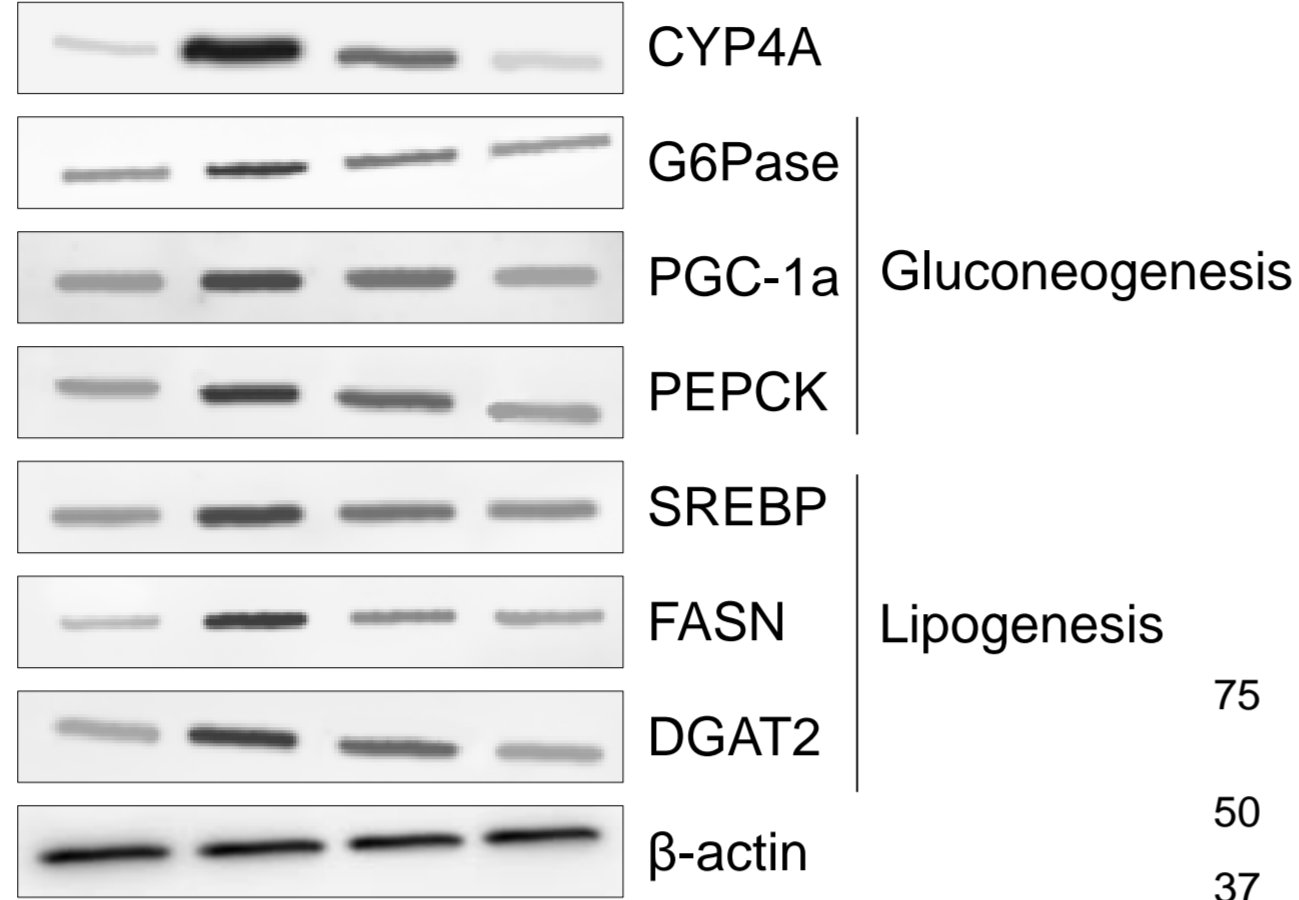

for Fig. 4D

|           |   |   |   |
|-----------|---|---|---|
| Glucose   | - | + | + |
| Palmitate | - | + | + |
| HET0016   | - | - | + |

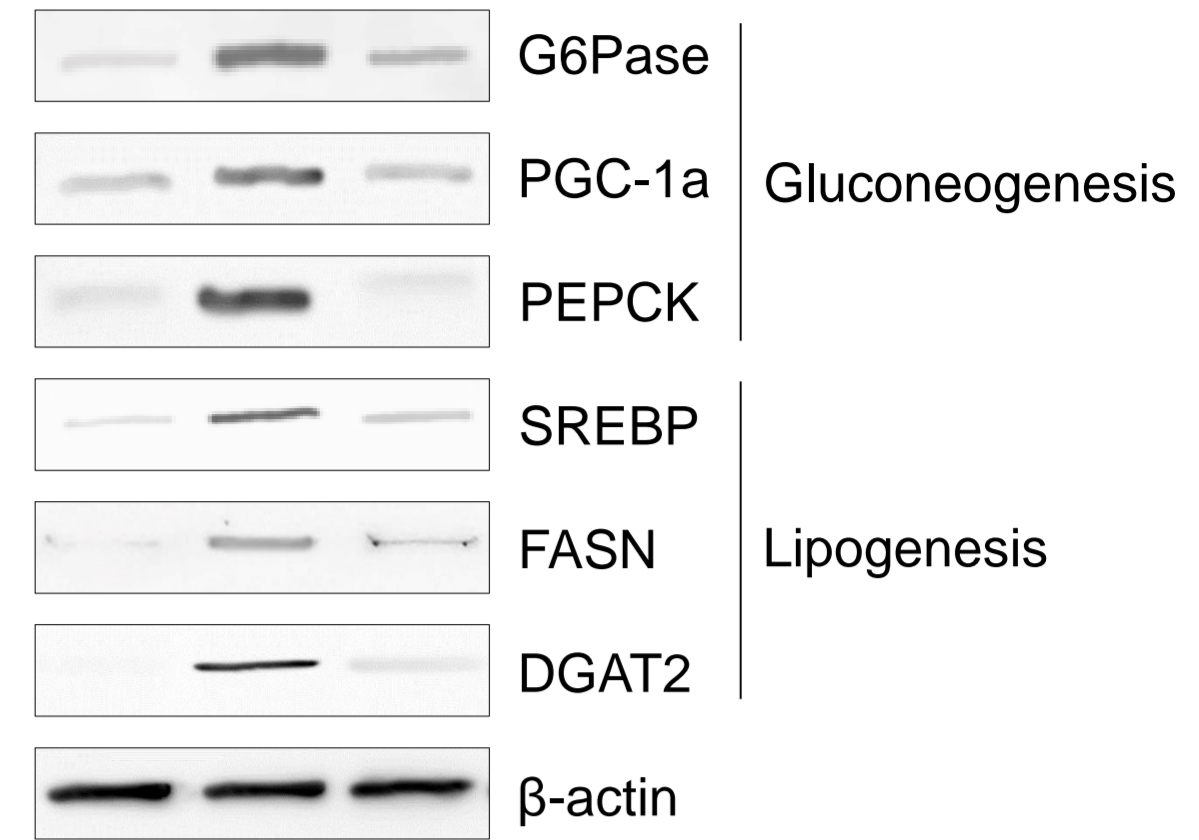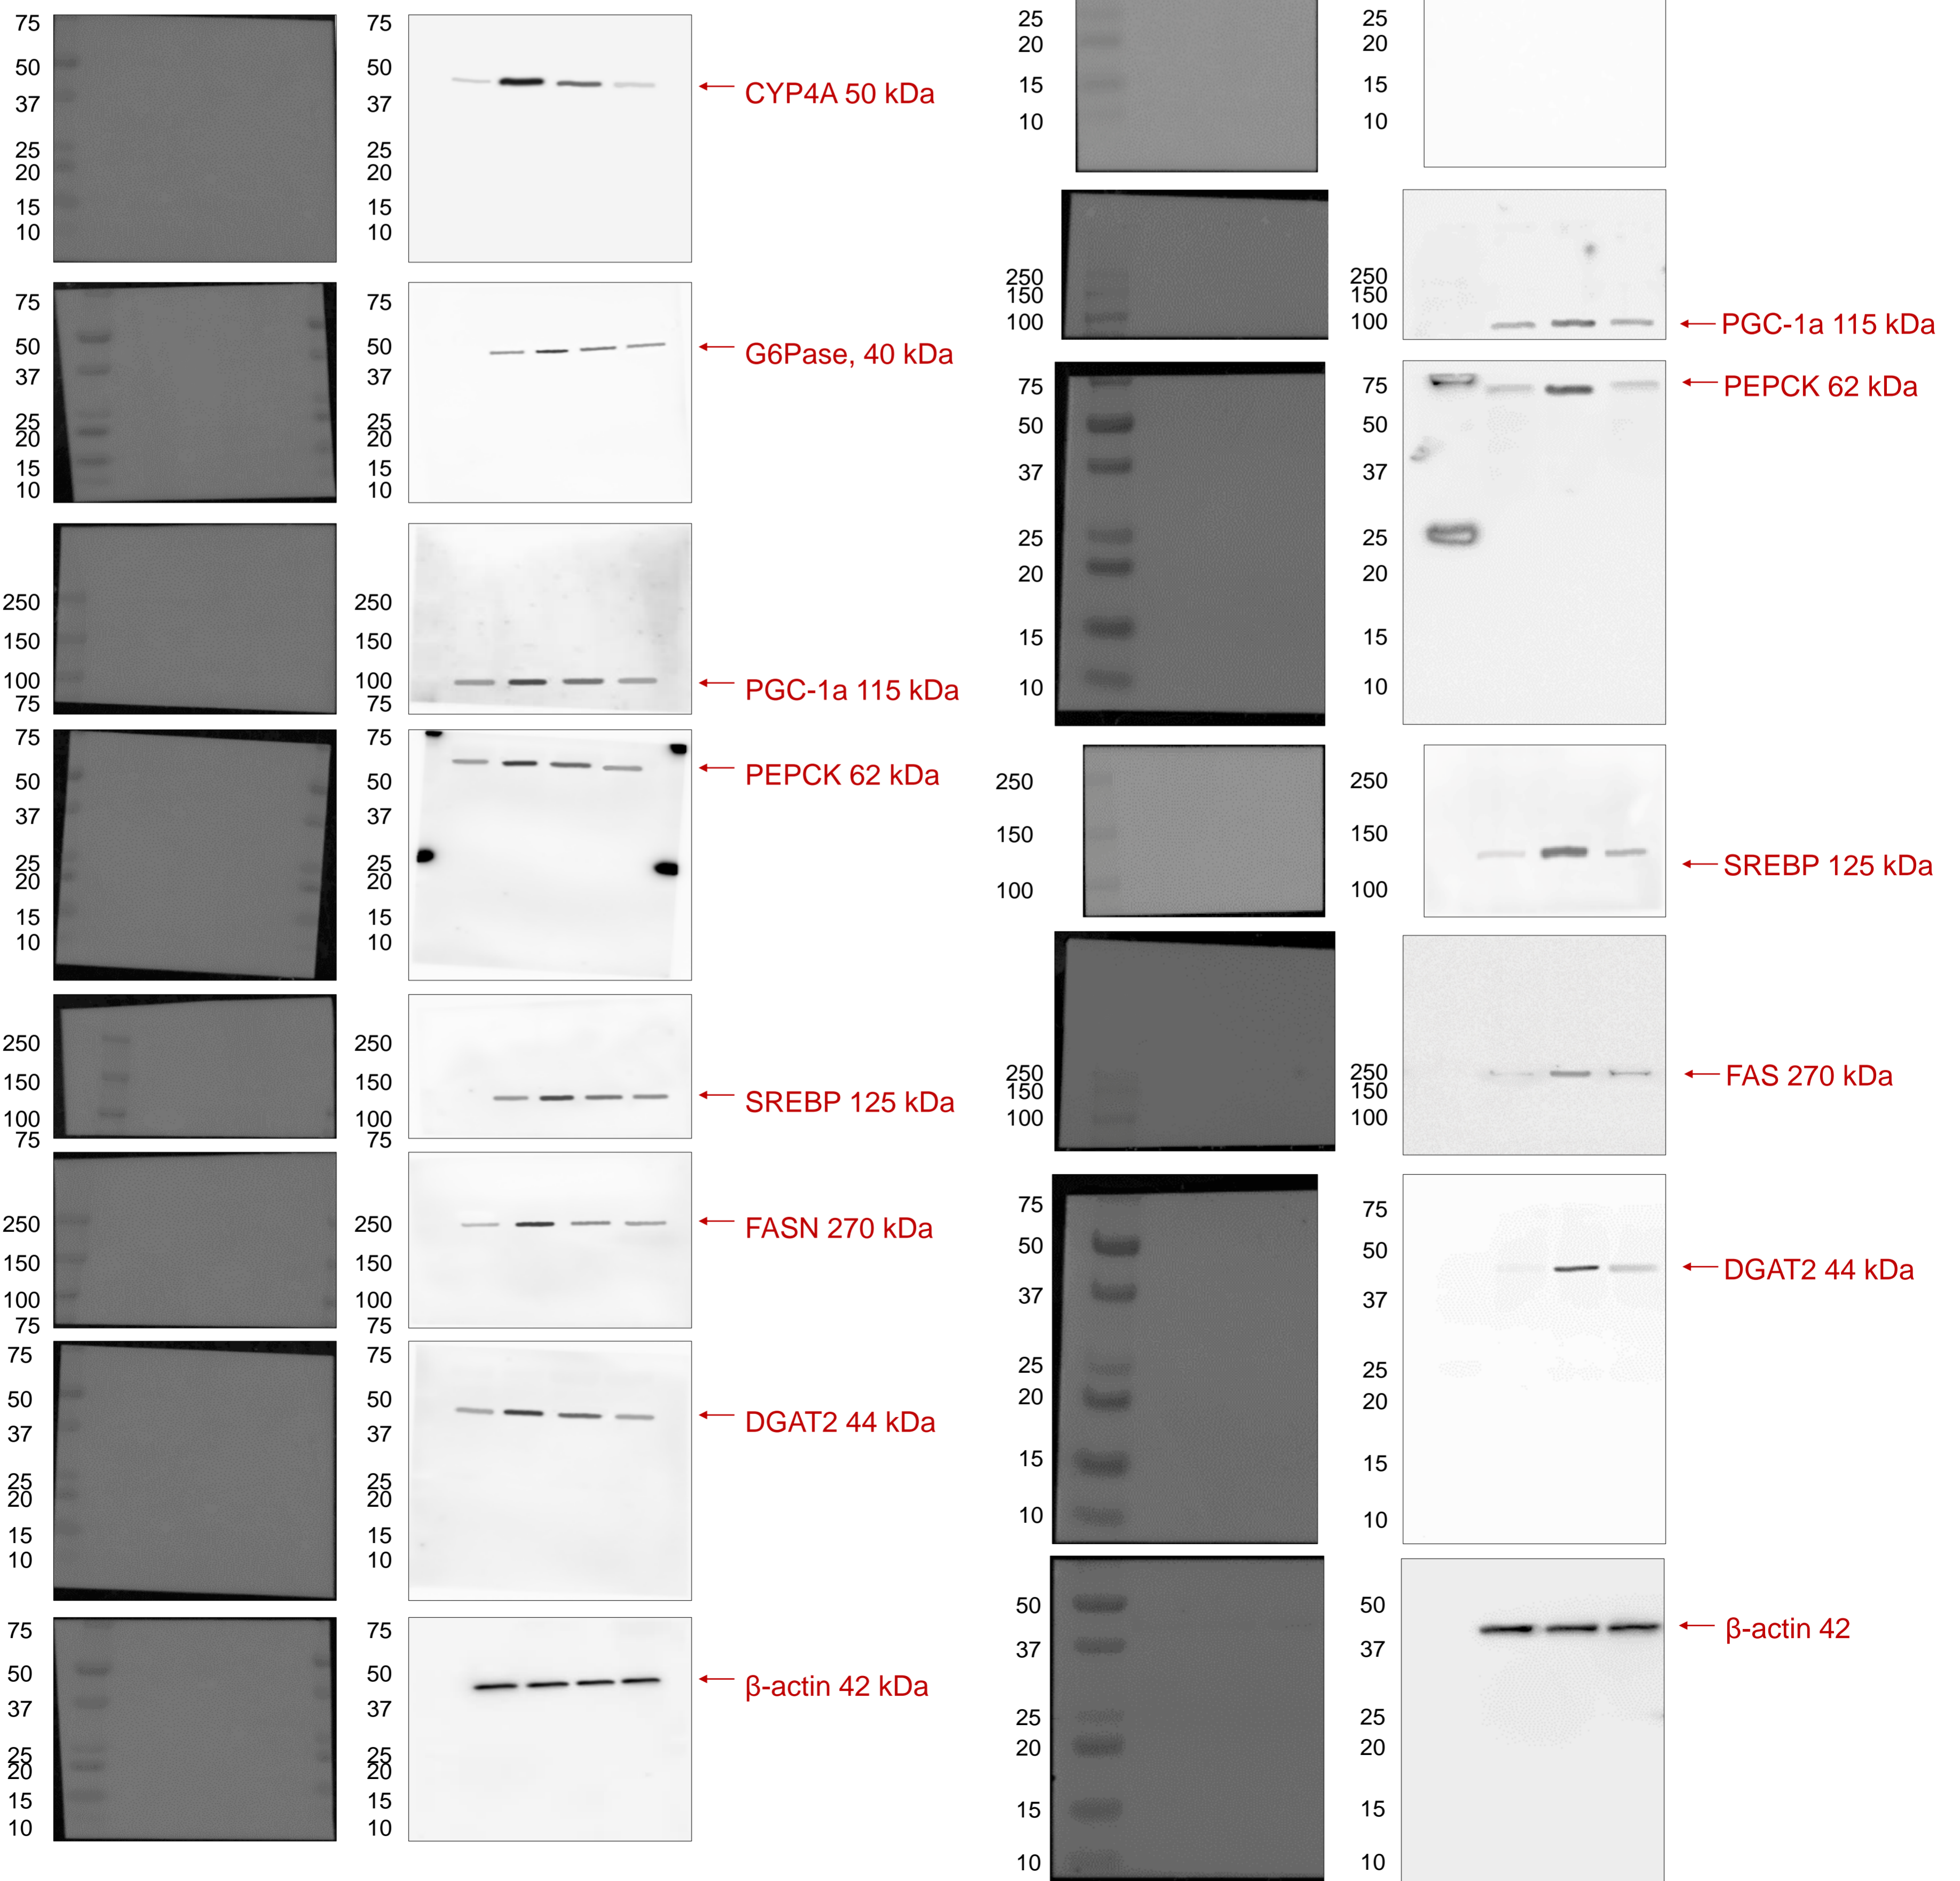

# Figure S5

for Fig. 5B

|           |   |   |   |
|-----------|---|---|---|
| Glucose   | - | + | + |
| Palmitate | - | + | + |
| HET0016   | - | - | + |

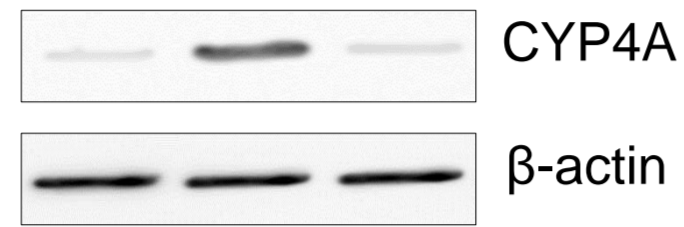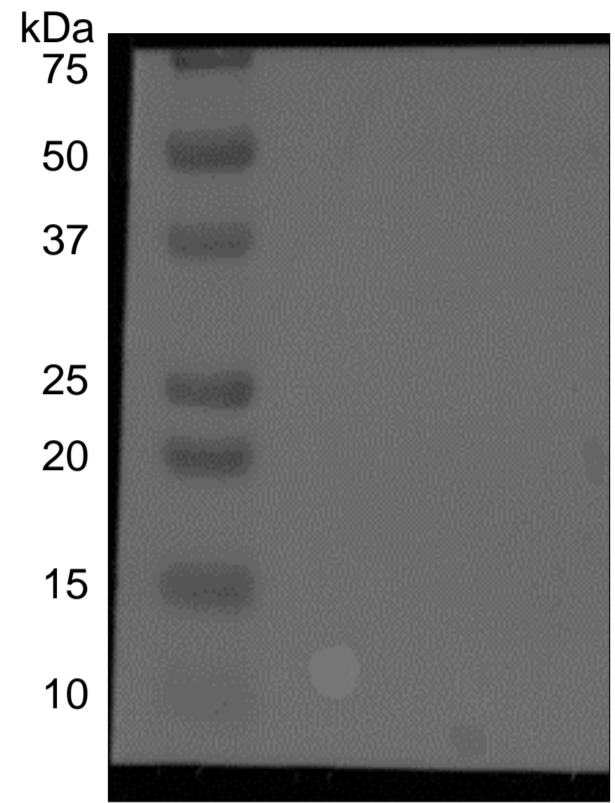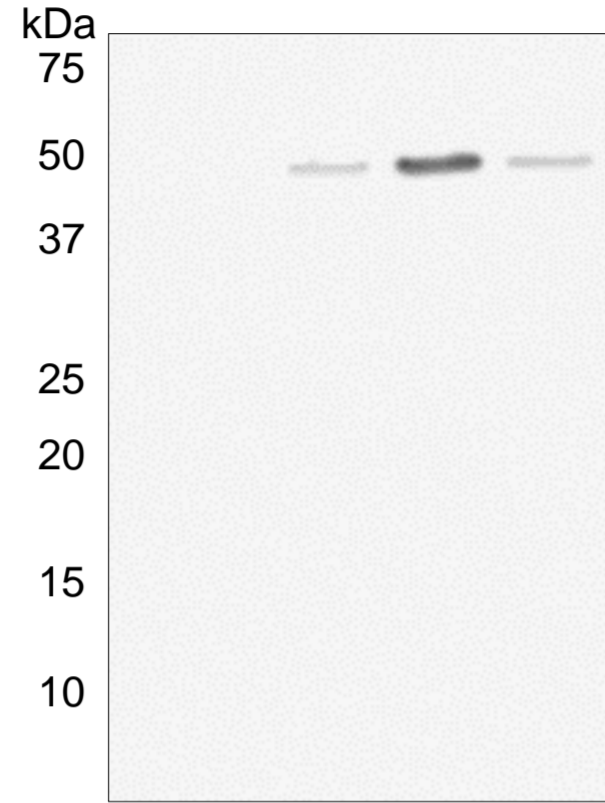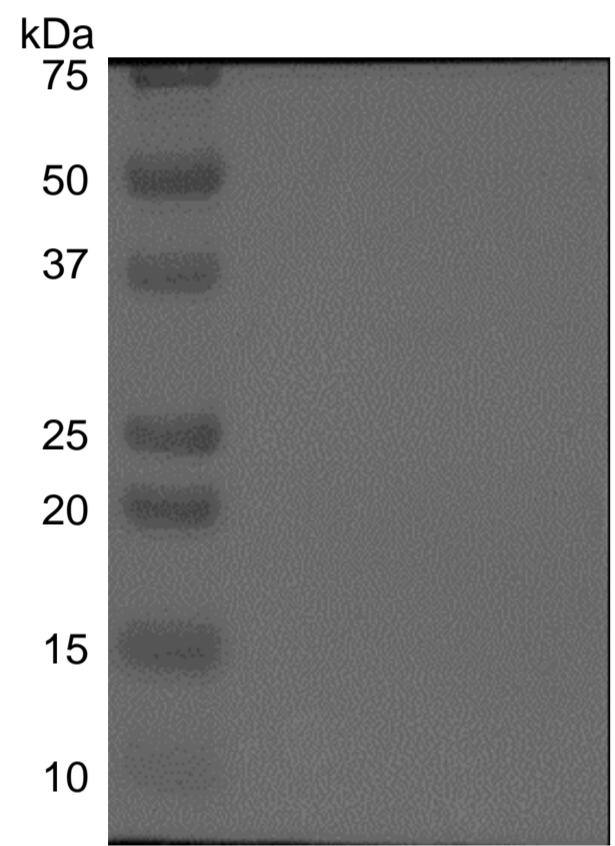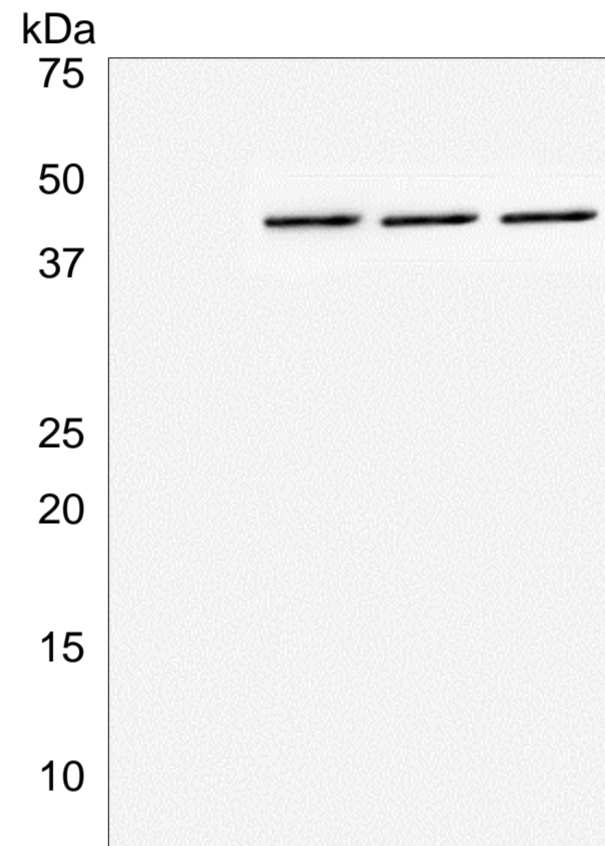

for Fig. 5E

|           |   |   |   |
|-----------|---|---|---|
| Glucose   | - | + | + |
| Palmitate | - | + | + |
| HET0016   | - | - | + |

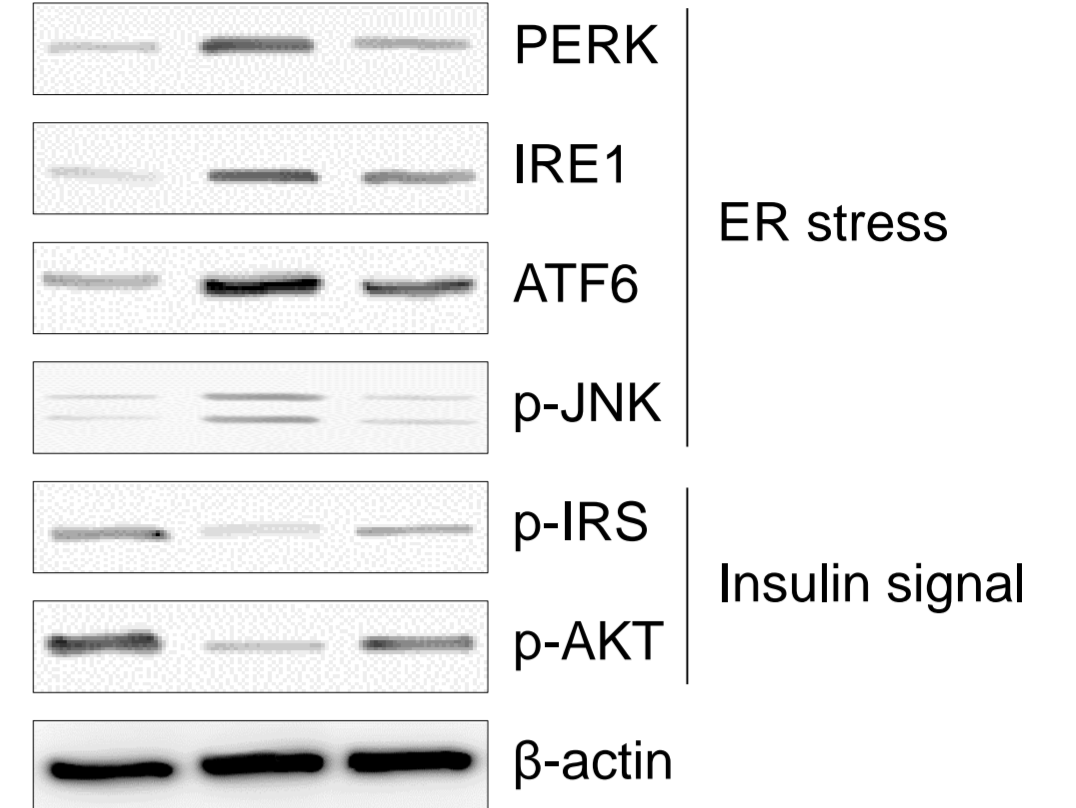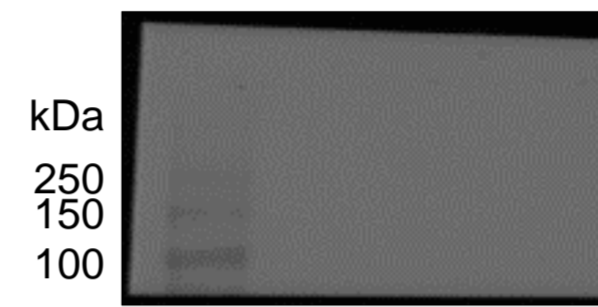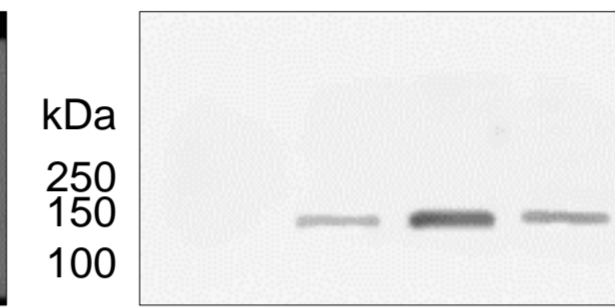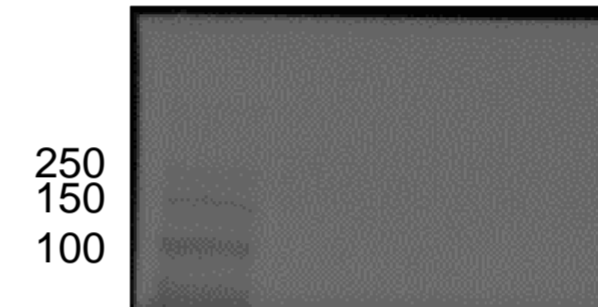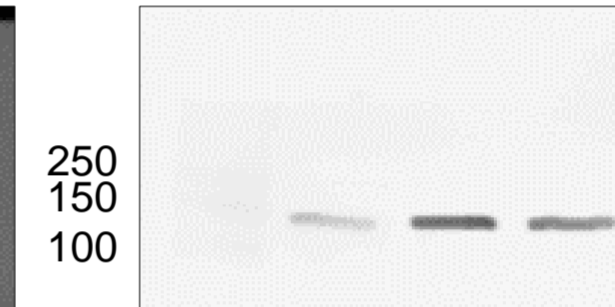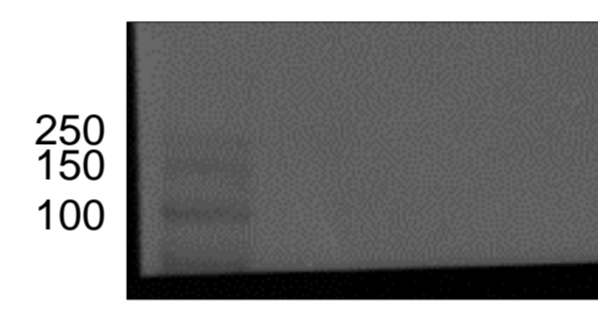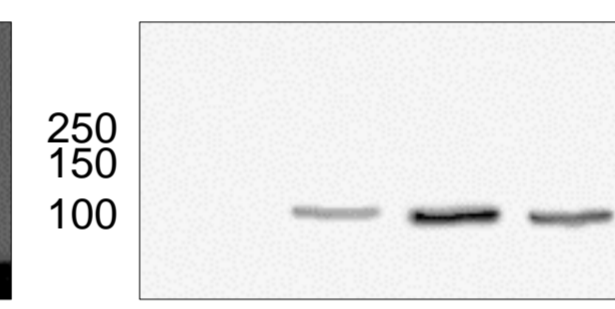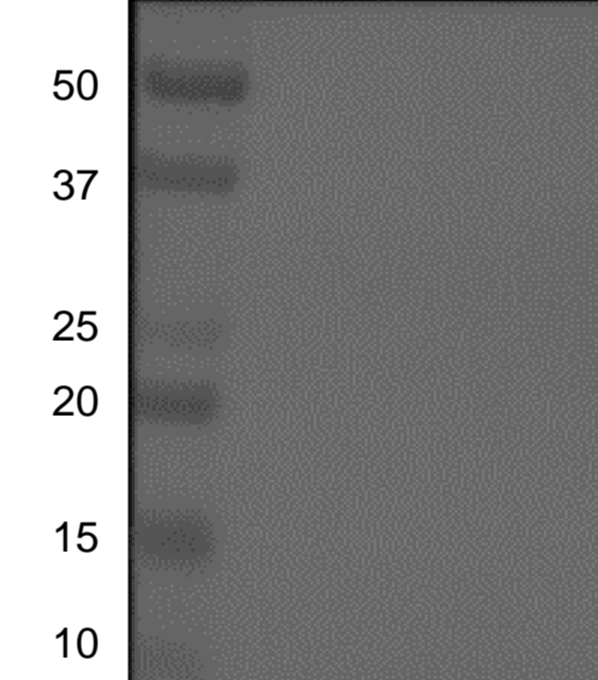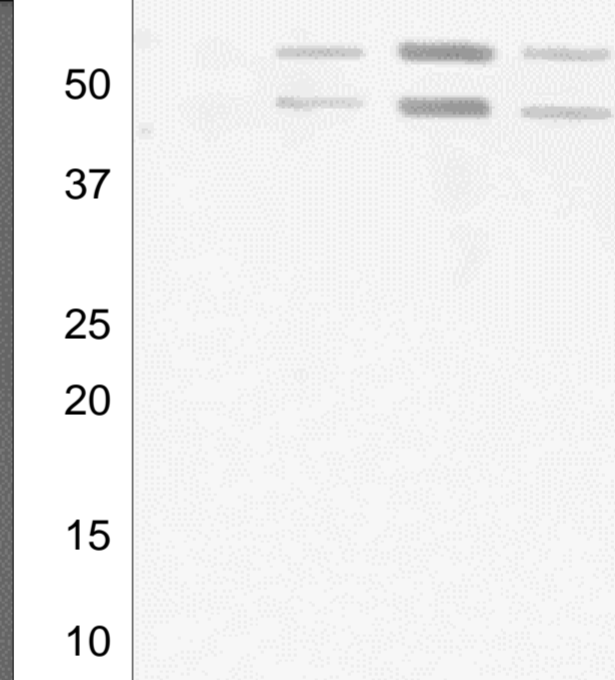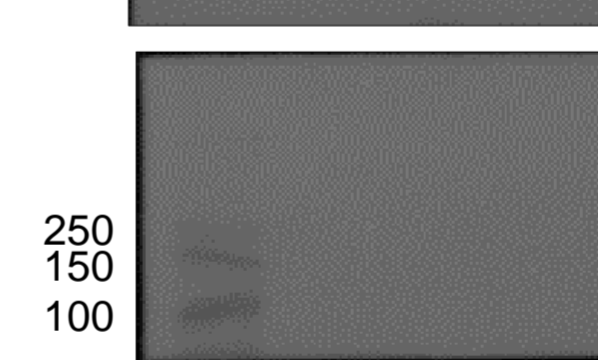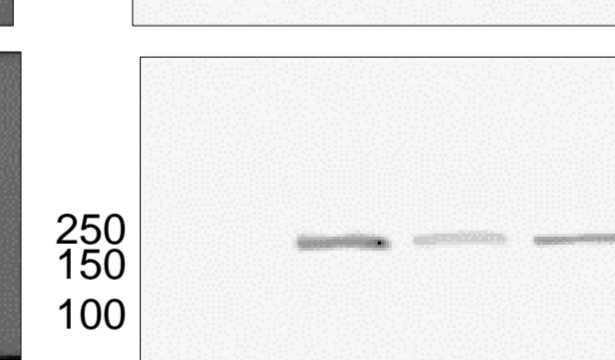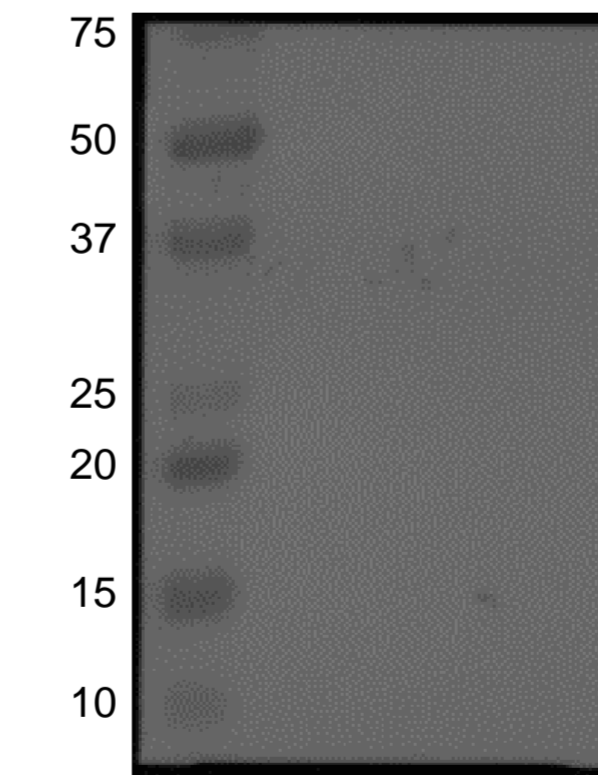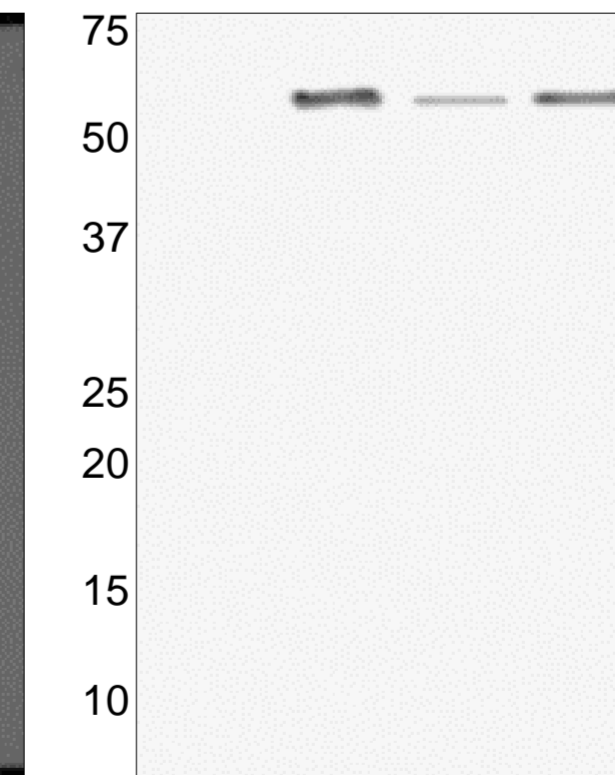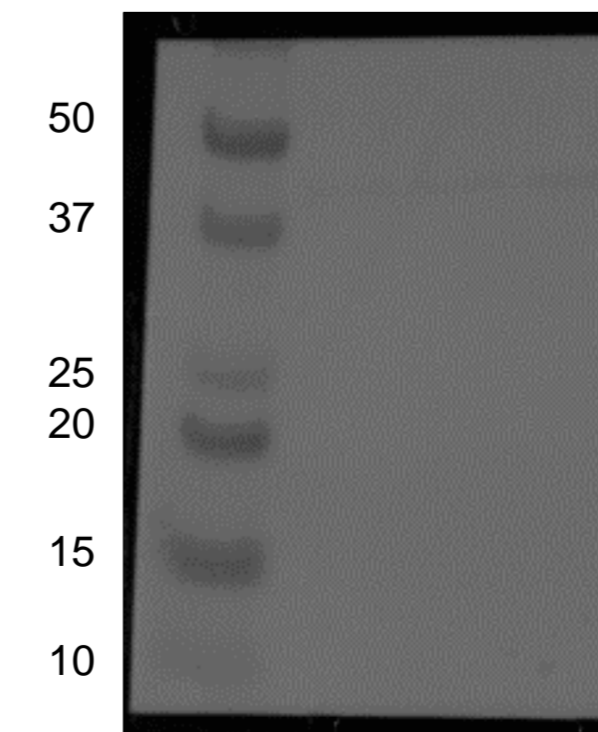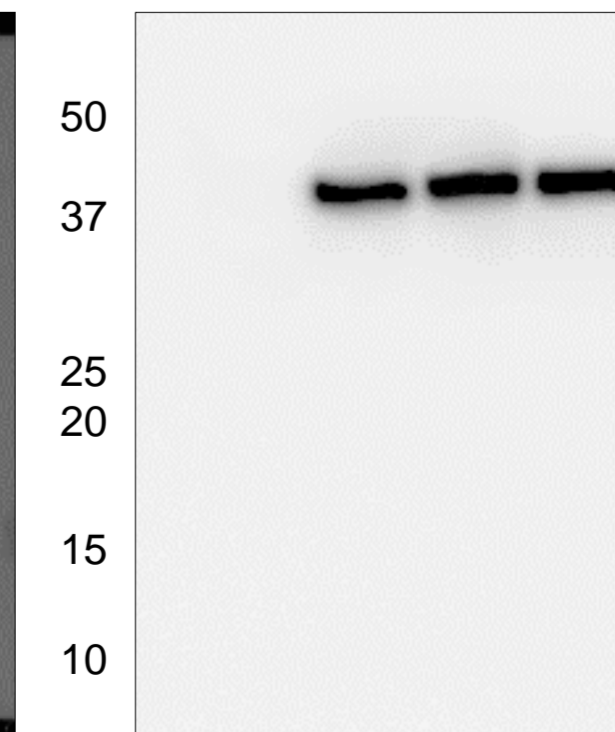

Supplement: 13036_2019_198_MOESM1_ESM.pdf [file 13036_2019_198_MOESM1_ESM.pdf]
